# Supplementary material
Source: bioRxiv or medRxiv preprint supplement (https://www.medrxiv.org/highwire/filestream/86466/field_highwire_adjunct_files/0/2020.06.15.20131391-1.pdf)
Supplement: Supplementary file [file 2020.06.15.20131391-1.pdf]

# Identification of immunodominant linear epitopes from SARS-CoV-2 patient plasma

Lluc Farrera-Soler<sup>1</sup>, Jean-Pierre Daguier<sup>1</sup>, Sofia Barluenga<sup>1</sup>, Patrick Cohen<sup>2</sup>, Sabrina Pagano<sup>2</sup>, Sabine Yerly<sup>2</sup>, Laurent Kaiser<sup>2,3</sup>, Nicolas Vuilleumier<sup>2</sup>, Nicolas Winssinger<sup>1\*</sup>

## SUPPLEMENTARY INFORMATION

### 1. Design of the 200-member PNA-peptide library

The Spike ectodomain protein of SARS-CoV-2 (residues 1-1213; strain Wuhan-Hu-1; GenBank: QHD43416.1)(1) was divided into 200 different 12mer peptides (1-100 starting in amino acid 1 and overlapping with 6 amino acids 101-200 starting at amino acid 7). All the peptides were synthesized with a unique PNA tag to allow for microarray analysis.

```
1  mfvflvllpl  vssqcvnltt  rtqlppaytn  sftgrvyyppd  kvfrssvlhs  tqdlflpffs
61  nvtwfhaihv  sgtngtkrfd  npvlpfndgv  yfasteksni  irgwifgttl  dsktqsliv
121 nnatnvvikv  cefqfcndpf  lgvyhknnk  swmesefrvy  ssannctfey  vsqpflmdle
181 gkqgnfknlr  efvfknidgy  fkiyskhtpi  nlvrldpqqf  saleplvdlp  iginitrftq
241 llalhrsylt  pgdsssgwta  gaaayyvgy  qprrtflkyn  engtitdavid  caldplsetk
301 ctlksftvek  giyqtsnfrv  qptesivrfp  nitnlcpfge  vfnatrfasv  yawnrkrisk
361 cvadysvlyn  sasfstfkcy  gvsptklndl  cftnvyadsf  virgdevrqi  appqgtkiad
421 ynyklpddft  gcviawnsnn  ldskvggyn  ylyrlfrksn  lkpferdist  eiyqagstpc
481 ngvegfnicy  plqsygfppt  ngvgyqpyrv  vvlsfellha  patvcgpkks  tnlvknkcvn
541 fnfnlgtgtg  vltesnkkfl  pfqqfgrdia  dttdavrdpq  tleilditpc  sfggvsvitp
601 gtntsnqvav  lyqdvntev  pvaihadtlt  ptwrvystgs  nvfqtragcl  igaehvnnsy
661 ecdipigagi  casyqtqtns  prrarsvasq  siiaytmslg  aensvaysnn  siaiptnfti
721 svtteilpvs  mtktsvdctm  yicgdstecs  nlllqygsfc  tqlnraltgi  aveqdkntqe
781 vfaqvkqiyk  tppikdfggf  nfsqilpdp  kpskrsfied  llfnkvtlad  agfikqygd
841 lgdiaardli  caqkfngltv  lpplltdemi  aqytsallag  titsgwtfga  gaalqipfam
901 qmayrfngig  vtqnvlyenq  klianqfnsa  igkiqdslls  tasalgklqd  vvnqnaqaln
961 tlvkqlssnf  gaissvlndi  lsrlkveae  vqidrlitgr  lqslqtyvtq  qliraaeira
1021 sanlaatkms  ecvlqgskrv  dfcggkgyhlm  sfpqsaphgv  vflhvtvpa  qeknfttapa
1081 ichdgkahfp  regvfvsngt  hwfvtrqrfy  epqiittdnt  fvsngcdvvi  givnntvydp
1141 lqpeldsfke  eldkyfknht  spdvdldgis  ginasvniq  keidrlneva  knlneslidl
1201 qelgkyeqyi  kwpyiwlgf  iagliaimv  timlccmtsc  csclkgccsc  gscckfdedd
1261 sepvlkgvkl  hyt
```

Synthesis of the PNA-peptide conjugate was started with the peptide on the C' terminus followed by a PEG spacer and followed by a unique 14mer coding PNA.

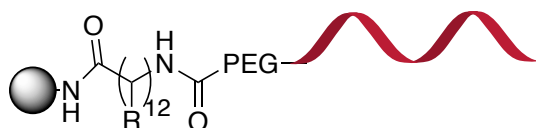

|    | Peptide N' to C' | PNA C' to N'   |
|----|------------------|----------------|
| 1  | mfvflvllplvs     | GCCGTGGGTGCGAA |
| 2  | sqcvnlttrtql     | GCCGTGGGTGGAGA |
| 3  | yypdkvfrssvl     | GCCGTGGGTGCAGG |
| 4  | hstqdlflpffs     | GCCGTGGGTGGACG |
| 5  | nvtwfhaihvsq     | GCCGTGGGCACGAA |
| 6  | tngtkrfdnpvl     | GCCGTGGGCAGAGA |
| 7  | pfndgvfyfaste    | GCCGTGGGCACAGG |
| 8  | ksniirgwifgt     | GCCGTGGGCAGACG |
| 9  | tltsktqsliv      | GCCGTGGACGCGAA |
| 10 | nnatnvvikvce     | GCCGTGGACGGAGA |
| 11 | fqfcndpflgvv     | GCCGTGGACGCAGG |
| 12 | yhknnkswmese     | GCCGTGGACGGACG |
| 13 | frvyssannctf     | GCCGTGGCGACGAA |
| 14 | eyvsqpflmdle     | GCCGTGGCGAGAGA |
| 15 | gkqgnfknlfref    | GCCGTGGCGACAGG |
| 16 | vfknidgyfkiy     | GCCGTGGCGAGACG |
| 17 | skhtpinlvrdl     | GCCGTGGAGCCGAA |
| 18 | pqgfsaleplvd     | GCCGTGGAGCGAGA |
| 19 | lpiginitrftq     | GCCGTGGAGCCAGG |
| 20 | llalhrsyltpg     | GCCGTGGAGCGACG |
| 21 | dsssgwtagaaa     | GCCGCCGGTGCGAA |

|    |               |                 |
|----|---------------|-----------------|
| 22 | yyvgylqprtfl  | GCCGCCGGTGGAGA  |
| 23 | lkynengttda   | GCCGCCGGTGCAGG  |
| 24 | vdcaIdplsetk  | GCCGCCGGTGGACG  |
| 25 | ctIksftvekgi  | GCCGCCGGCACGAA  |
| 26 | yqtsnfrvqpte  | GCCGCCGGCAGAGA  |
| 27 | sivrfpnitnlc  | GCCGCCGGCACAGG  |
| 28 | pfgevfnatrfa  | GCCGCCGGCAGACG  |
| 29 | svyawnrkrisn  | GCCGCCGACGCGAA  |
| 30 | cvadysvlynsa  | GCCGCCGACGGAGA  |
| 31 | sfstfkcygvsp  | GCCGCCGACGCAGG  |
| 32 | tklndlcftnv   | GCCGCCGACGGACG  |
| 33 | adsvirgdevr   | GCCGCCGCGACGAA  |
| 34 | qiapqqtgkiad  | GCCGCCGCGAGAGA  |
| 35 | ynyklpddftgc  | GCCGCCGCGACAGG  |
| 36 | viawnsnldsk   | GCCGCCGCGAGACG  |
| 37 | vggnylyrlf    | GCCGCCGAGCCGAA  |
| 38 | rksnlkpfardi  | GCCGCCGAGCGAGA  |
| 39 | steiyqagstpc  | GCCGCCGAGCCAGG  |
| 40 | ngvegfnicyfpl | GCCGCCGAGCGACG  |
| 41 | qsygfqptngvg  | GCCGGCAGTGCAGAA |
| 42 | yqpyrvvlsfe   | GCCGGCAGTGGAGA  |
| 43 | llhapatvcgpk  | GCCGGCAGTGCAGG  |
| 44 | kstnlvknkcvn  | GCCGGCAGTGGACG  |
| 45 | fnfngltgtgvl  | GCCGGCAGCACGAA  |
| 46 | tesnkkflpfqq  | GCCGGCAGCAGAGA  |
| 47 | fgrdiadttDav  | GCCGGCAGCACAGG  |
| 48 | rdpqtleildit  | GCCGGCAGCAGACG  |
| 49 | pcsfggvsvitp  | GCCGGCAACGCGAA  |
| 50 | gtntsnqvavly  | GCCGGCAACGGAGA  |
| 51 | qdvntevpvai   | GCCGGCAACGCAGG  |

|    |               |                |
|----|---------------|----------------|
| 52 | hadqltptwrvy  | GCCGGCAACGGACG |
| 53 | stgsnvfqtrag  | GCCGGCACGACGAA |
| 54 | cligaehvnnsy  | GCCGGCACGAGAGA |
| 55 | ecdipigagica  | GCCGGCACGACAGG |
| 56 | syqtqtnsprra  | GCCGGCACGAGACG |
| 57 | rsvasqsiayt   | GCCGGCAAGCCGAA |
| 58 | mslugaensvays | GCCGGCAAGCGAGA |
| 59 | nnsiaiptnfti  | GCCGGCAAGCCAGG |
| 60 | svtteilpvsmt  | GCCGGCAAGCGACG |
| 61 | ktsvdctmyicg  | GCCGCGAGTGCGAA |
| 62 | dstecslllqy   | GCCGCGAGTGGAGA |
| 63 | gsfctqlnralt  | GCCGCGAGTGCAGG |
| 64 | giaveqdkntqe  | GCCGCGAGTGGACG |
| 65 | vfaqvkqiyktp  | GCCGCGAGCACGAA |
| 66 | pikdfggfnfsq  | GCCGCGAGCAGAGA |
| 67 | ilpdpskpskrs  | GCCGCGAGCACAGG |
| 68 | fiedllfnkvltl | GCCGCGAGCAGACG |
| 69 | adagfikqygdc  | GCCGCGAACGCGAA |
| 70 | lgdiaardlica  | GCCGCGAACGGAGA |
| 71 | qkfngltvlppl  | GCCGCGAACGCAGG |
| 72 | ltdemiaqytsa  | GCCGCGAACGGACG |
| 73 | llagtitsgwtf  | GCCGCGACGACGAA |
| 74 | gagaalqipfam  | GCCGCGACGAGAGA |
| 75 | qmayrfngigvt  | GCCGCGACGACAGG |
| 76 | qnvlyenqklia  | GCCGCGACGAGACG |
| 77 | nqfnsaigkiqd  | GCCGCGAAGCCGAA |
| 78 | slsstasalgl   | GCCGCGAAGCGAGA |
| 79 | qdvvnqnaqaln  | GCCGCGAAGCCAGG |
| 80 | tlvkqlssnfga  | GCCGCGAAGCGACG |
| 81 | issvldilsrl   | GCCGGGCGTGCGAA |

|     |               |                |
|-----|---------------|----------------|
| 82  | dkveaevqidrl  | GCCGGGCGTGGAGA |
| 83  | itgrlqslqtyv  | GCCGGGCGTGCAGG |
| 84  | tqqliraaeira  | GCCGGGCGTGGACG |
| 85  | sanlaatkmsc   | GCCGGGCGCACGAA |
| 86  | vlqskrvdfcg   | GCCGGGCGCAGAGA |
| 87  | kgyhlmsfpqsa  | GCCGGGCGCACAGG |
| 88  | phgvvflhvtyv  | GCCGGGCGCAGACG |
| 89  | paqeknfttapa  | GCCGGGCACGCGAA |
| 90  | ichdgkahfpre  | GCCGGGCACGGAGA |
| 91  | gvfvsngthwfv  | GCCGGGCACGCAGG |
| 92  | tqrnfypqiit   | GCCGGGCACGGACG |
| 93  | tdntfvsngcdv  | GCCGGGCCGACGAA |
| 94  | vigivnntvydp  | GCCGGGCCGAGAGA |
| 95  | lqpeldsfkeel  | GCCGGGCCGACAGG |
| 96  | dkyfknhtspdv  | GCCGGGCCGAGACG |
| 97  | dlgdisginasv  | GCCGGGCAGCCGAA |
| 98  | vniqkeidrlne  | GCCGGGCAGCGAGA |
| 99  | vaklneslidl   | GCCGGGCAGCCAGG |
| 100 | qelgkyeqyikw  | GCCGGGCAGCGACG |
| 101 | llplvssqcvnl  | GAACTGGGTGCGAA |
| 102 | ttrtqlppaytn  | GAACTGGGTGGAGA |
| 103 | sftrgvyyppdkv | GAACTGGGTGCAGG |
| 104 | frssvlhstqdl  | GAACTGGGTGGACG |
| 105 | flpffsnvtwfh  | GAACTGGGCACGAA |
| 106 | aihvsngtngtkr | GAACTGGGCAGAGA |
| 107 | fdnpvlpfndgv  | GAACTGGGCACAGG |
| 108 | yfasteksniir  | GAACTGGGCAGACG |
| 109 | gwifgttldskt  | GAACTGGACGCGAA |
| 110 | qslivnnatnv   | GAACTGGACGGAGA |
| 111 | vikvcefqfcd   | GAACTGGACGCAGG |

|     |               |                             |
|-----|---------------|-----------------------------|
| 112 | pflgvyyhknnk  | G A A C T G G A C G G A C G |
| 113 | swmesefrvyss  | G A A C T G G C G A C G A A |
| 114 | annctfeyvsqp  | G A A C T G G C G A G A G A |
| 115 | flmdlegkqgnf  | G A A C T G G C G A C A G G |
| 116 | knlrefvfknid  | G A A C T G G C G A G A C G |
| 117 | gyfkiyskhtpi  | G A A C T G G A G C C G A A |
| 118 | nlvrldpqgfsa  | G A A C T G G A G C G A G A |
| 119 | leplvdlpigin  | G A A C T G G A G C C A G G |
| 120 | itrftllalhr   | G A A C T G G A G C G A C G |
| 121 | syltpgdsssgw  | G A A C C C G G T G C G A A |
| 122 | tagaaayyvgy   | G A A C C C G G T G G A G A |
| 123 | qprtflkynen   | G A A C C C G G T G C A G G |
| 124 | gtitdavdcald  | G A A C C C G G T G G A C G |
| 125 | plsetkctlksf  | G A A C C C G G C A C G A A |
| 126 | tvekgiyqtsnf  | G A A C C C G G C A G A G A |
| 127 | rvqptesivrfp  | G A A C C C G G C A C A G G |
| 128 | nitnlcpfgevf  | G A A C C C G G C A G A C G |
| 129 | natrfasvyawn  | G A A C C C G A C G C G A A |
| 130 | rkriscnvadys  | G A A C C C G A C G G A G A |
| 131 | vlynsasfstfk  | G A A C C C G A C G C A G G |
| 132 | cygvsptklndl  | G A A C C C G A C G G A C G |
| 133 | cftnvadydsfvi | G A A C C C G C G A C G A A |
| 134 | rgdevrqiapgq  | G A A C C C G C G A G A G A |
| 135 | tgkiadynyklp  | G A A C C C G C G A C A G G |
| 136 | ddftgcviawns  | G A A C C C G C G A G A C G |
| 137 | nnldskvggnyn  | G A A C C C G A G C C G A A |
| 138 | ylylfrksnlk   | G A A C C C G A G C G A G A |
| 139 | pferdisteiyq  | G A A C C C G A G C C A G G |
| 140 | agstpcngveg   | G A A C C C G A G C G A C G |
| 141 | ncyfplqsyg    | G A A C G C A G T G C G A A |

|     |               |                             |
|-----|---------------|-----------------------------|
| 142 | ptngvgyqpyrv  | G A A C G C A G T G G A G A |
| 143 | vvlsfellhapa  | G A A C G C A G T G C A G G |
| 144 | tvchgpkstnlv  | G A A C G C A G T G G A C G |
| 145 | knkcvnfnfngl  | G A A C G C A G C A C G A A |
| 146 | tgtgvltesnkk  | G A A C G C A G C A G A G A |
| 147 | flpfqqfgrdia  | G A A C G C A G C A C A G G |
| 148 | dttdavrdpqtI  | G A A C G C A G C A G A C G |
| 149 | eilditpcsfgg  | G A A C G C A A C G C G A A |
| 150 | vsvitpgtntsn  | G A A C G C A A C G G A G A |
| 151 | qvavlyqdvnt   | G A A C G C A A C G C A G G |
| 152 | evpvaihadaqlt | G A A C G C A A C G G A C G |
| 153 | ptwrvystgsnv  | G A A C G C A C G A C G A A |
| 154 | fqtragcligae  | G A A C G C A C G A G A G A |
| 155 | hvnnsyecdipi  | G A A C G C A C G A C A G G |
| 156 | gagicasyqtqt  | G A A C G C A C G A G A C G |
| 157 | nsprarsvasq   | G A A C G C A A G C C G A A |
| 158 | siiaytmslgae  | G A A C G C A A G C G A G A |
| 159 | nsvaysnnsiai  | G A A C G C A A G C C A G G |
| 160 | ptnftisvttei  | G A A C G C A A G C G A C G |
| 161 | lpvsmtktsvdc  | G A A C C G A G T G C G A A |
| 162 | tmyicgdsteCs  | G A A C C G A G T G G A G A |
| 163 | nlllqygsfctq  | G A A C C G A G T G C A G G |
| 164 | lnraltgiaveq  | G A A C C G A G T G G A C G |
| 165 | dkntqevfaqvK  | G A A C C G A G C A C G A A |
| 166 | qiyktpikdfg   | G A A C C G A G C A G A G A |
| 167 | gfnfsqilpdps  | G A A C C G A G C A C A G G |
| 168 | kpskrsfiedll  | G A A C C G A G C A G A C G |
| 169 | fnkvtladagfi  | G A A C C G A A C G C G A A |
| 170 | kqygdclgdiaa  | G A A C C G A A C G G A G A |
| 171 | rdlicaqkfngl  | G A A C C G A A C G C A G G |

|     |               |                             |
|-----|---------------|-----------------------------|
| 172 | tvlpplltдеми  | G A A C C G A A C G G A C G |
| 173 | aqytsallagti  | G A A C C G A C G A C G A A |
| 174 | tsgwtfgagaal  | G A A C C G A C G A G A G A |
| 175 | qipfamqmayrf  | G A A C C G A C G A C A G G |
| 176 | ngigvtqnvlye  | G A A C C G A C G A G A C G |
| 177 | nqklianqfnsa  | G A A C C G A A G C C G A A |
| 178 | igkiqdsIssta  | G A A C C G A A G C G A G A |
| 179 | salgklqdvvnq  | G A A C C G A A G C C A G G |
| 180 | naqalntlvkql  | G A A C C G A A G C G A C G |
| 181 | ssnfgaIssvln  | G A A C G G C G T G C G A A |
| 182 | dilsrldkveae  | G A A C G G C G T G G A G A |
| 183 | vqidrlitgrlq  | G A A C G G C G T G C A G G |
| 184 | slqtyvtqqlir  | G A A C G G C G T G G A C G |
| 185 | aaeirasanaaa  | G A A C G G C G C A C G A A |
| 186 | tkmsecvlgqsk  | G A A C G G C G C A G A G A |
| 187 | rvdfcgkgyhlm  | G A A C G G C G C A C A G G |
| 188 | sfpqsaphgvvf  | G A A C G G C G C A G A C G |
| 189 | lhvtyvpaqekn  | G A A C G G C A C G C G A A |
| 190 | fttapaichdgk  | G A A C G G C A C G G A G A |
| 191 | ahfpregvfvsn  | G A A C G G C A C G C A G G |
| 192 | sgncdvvigivn  | G A A C G G C A C G G A C G |
| 193 | epqiittdntfv  | G A A C G G C C G A C G A A |
| 194 | sgncdvvigivn  | G A A C G G C C G A G A G A |
| 195 | ntvydplqpeld  | G A A C G G C C G A C A G G |
| 196 | sfkeeldkyfkn  | G A A C G G C C G A G A C G |
| 197 | htspdvdlgdis  | G A A C G G C A G C C G A A |
| 198 | ginasvvnique  | G A A C G G C A G C G A G A |
| 199 | idrlnevaknlIn | G A A C G G C A G C C A G G |
| 200 | eslidlqelgky  | G A A C G G C A G C G A C G |



## 2. Synthesis of the PNA-Peptide conjugates

All reagents and solvents for the organic synthesis were purchased from commercial sources and were used without further purification. Automated solid phase synthesis was carried out on an Intavis AG Multiprep RS instrument. MALDI-TOF Mass spectra were measured using a Bruker Daltonics Autoflex spectrometer operated in positive mode. HPLC purification was performed with an Agilent Technologies 1260 infinity HPLC using a ZORBAX 300SB-C18 column (9.4 x 250 mm).

### 2.1 General procedure for synthesis of the library and individual members

2.0 mg of NovaPEG® Rink amide resin (0.44 mmol/g, NovaBiochem) were added into 200 different wells of 96-well plates for the Automated solid phase synthesis. The resin was swollen in CH<sub>2</sub>Cl<sub>2</sub> for 10 min and washed two times with DMF. Iterative cycles of amide coupling (**Procedure 1**), capping of the resin (**Procedure 3**) and deprotection of the main chain protecting group (**Procedure 2**) were done in order to synthesize the PNA-peptide sequences. Each member of the library was checked at the end of the synthesis and finally all members were mixed together and cleaved from the resin and deprotected using **Procedure 4**.

#### **Procedure 1: Amide coupling**

The Fmoc protected PNA monomer or amino acid (4.0 equiv, 0.2M in NMP) was incubated for 5 min with HATU (3.5 equiv) and a base solution [DIPEA (4.0 equiv) and 2,6-lutidine (6.0 equiv) NMP]. The mixture was then added to the corresponding resin. After 20 minutes the mixture was filtered, the resin was washed with DMF, and a new premixed reaction solution was added to the resin for another 20 minutes. Finally, the resin was washed with 2 x DMF, 2 x CH<sub>2</sub>Cl<sub>2</sub> and 2 x DMF.

#### **Procedure 2: Fmoc deprotection**

A solution of 20% piperidine in DMF was added to the resin and allowed to react for 5 minutes. The mixture was filtered, the resin was washed with DMF and the sequence was repeated a second time for another 5 minutes. Finally, the resin was washed with 2 x DMF and 2 x CH<sub>2</sub>Cl<sub>2</sub> and 2 x DMF.

### **Procedure 3: Capping**

The resin was treated with a capping mixture (0.92 mL of acetic anhydride and 1.3 mL of 2,6 lutidine in 18 mL of DMF; 10 mL of solution/g of resin) for 5 minutes. After flushing the solution, the resin was washed with 2 x DMF, 2 x CH<sub>2</sub>Cl<sub>2</sub> and 2 x DMF.

### **Procedure 4: Cleavage from the resin and deprotection of the PNA/amino acid protecting groups**

Resin (5.0 mg, 1.0 μmol) was treated with 125 μL of a mixture of TFA and scavengers (440 μL of TFA + 25 mg phenol + 25 μL water + 10 μL triisopropylsilane) for 2.5 hours. The resin was filtered and washed with TFA (50 μL) and the collected fractions of cleavage product were precipitated in cold ether (1.5 mL). After centrifugation, the pellet was vortexed with cold Et<sub>2</sub>O (1.5 mL) and centrifuged again (14 000 rpm). The resulted pellet was dissolved in H<sub>2</sub>O/CH<sub>3</sub>CN (3/1, 1.5 mL) and lyophilized to obtain a white powder.

## **2.2 Characterization of the PNA-peptide library by MALDI. Expected molecular weights.**

|               |           |           |      |           |      |            |      |
|---------------|-----------|-----------|------|-----------|------|------------|------|
| <b>Member</b> | <b>MW</b> | <b>26</b> | 5442 | <b>52</b> | 5459 | <b>78</b>  | 5131 |
| <b>1</b>      | 5379      | <b>27</b> | 5325 | <b>53</b> | 5181 | <b>79</b>  | 5286 |
| <b>2</b>      | 5422      | <b>28</b> | 5304 | <b>54</b> | 5316 | <b>80</b>  | 5237 |
| <b>3</b>      | 5509      | <b>29</b> | 5426 | <b>55</b> | 5134 | <b>81</b>  | 5333 |
| <b>4</b>      | 5473      | <b>30</b> | 5277 | <b>56</b> | 5381 | <b>82</b>  | 5458 |
| <b>5</b>      | 5355      | <b>31</b> | 5271 | <b>57</b> | 5252 | <b>83</b>  | 5398 |
| <b>6</b>      | 5389      | <b>32</b> | 5379 | <b>58</b> | 5207 | <b>84</b>  | 5389 |
| <b>7</b>      | 5350      | <b>33</b> | 5296 | <b>59</b> | 5277 | <b>85</b>  | 5180 |
| <b>8</b>      | 5395      | <b>34</b> | 5171 | <b>60</b> | 5232 | <b>86</b>  | 5321 |
| <b>9</b>      | 5305      | <b>35</b> | 5384 | <b>61</b> | 5290 | <b>87</b>  | 5336 |
| <b>10</b>     | 5331      | <b>36</b> | 5309 | <b>62</b> | 5413 | <b>88</b>  | 5356 |
| <b>11</b>     | 5453      | <b>37</b> | 5411 | <b>63</b> | 5314 | <b>89</b>  | 5247 |
| <b>12</b>     | 5538      | <b>38</b> | 5476 | <b>64</b> | 5335 | <b>90</b>  | 5422 |
| <b>13</b>     | 5396      | <b>39</b> | 5205 | <b>65</b> | 5379 | <b>91</b>  | 5338 |
| <b>14</b>     | 5480      | <b>40</b> | 5308 | <b>66</b> | 5353 | <b>92</b>  | 5498 |
| <b>15</b>     | 5441      | <b>41</b> | 5242 | <b>67</b> | 5297 | <b>93</b>  | 5244 |
| <b>16</b>     | 5511      | <b>42</b> | 5528 | <b>68</b> | 5425 | <b>94</b>  | 5316 |
| <b>17</b>     | 5380      | <b>43</b> | 5210 | <b>69</b> | 5244 | <b>95</b>  | 5436 |
| <b>18</b>     | 5300      | <b>44</b> | 5351 | <b>70</b> | 5227 | <b>96</b>  | 5439 |
| <b>19</b>     | 5377      | <b>45</b> | 5196 | <b>71</b> | 5299 | <b>97</b>  | 5133 |
| <b>20</b>     | 5344      | <b>46</b> | 5463 | <b>72</b> | 5297 | <b>98</b>  | 5483 |
| <b>21</b>     | 5044      | <b>47</b> | 5253 | <b>73</b> | 5223 | <b>99</b>  | 5317 |
| <b>22</b>     | 5524      | <b>48</b> | 5386 | <b>74</b> | 5125 | <b>100</b> | 5574 |
| <b>23</b>     | 5318      | <b>49</b> | 5120 | <b>75</b> | 5311 | <b>101</b> | 5312 |
| <b>24</b>     | 5270      | <b>50</b> | 5263 | <b>76</b> | 5405 | <b>102</b> | 5429 |
| <b>25</b>     | 5258      | <b>51</b> | 5260 | <b>77</b> | 5291 | <b>103</b> | 5474 |

|            |      |            |      |            |      |            |      |
|------------|------|------------|------|------------|------|------------|------|
| <b>104</b> | 5432 | <b>129</b> | 5340 | <b>154</b> | 5270 | <b>179</b> | 5252 |
| <b>105</b> | 5538 | <b>130</b> | 5392 | <b>155</b> | 5384 | <b>180</b> | 5293 |
| <b>106</b> | 5276 | <b>131</b> | 5320 | <b>156</b> | 5180 | <b>181</b> | 5207 |
| <b>107</b> | 5345 | <b>132</b> | 5266 | <b>157</b> | 5293 | <b>182</b> | 5439 |
| <b>108</b> | 5440 | <b>133</b> | 5319 | <b>158</b> | 5242 | <b>183</b> | 5440 |
| <b>109</b> | 5321 | <b>134</b> | 5306 | <b>159</b> | 5233 | <b>184</b> | 5478 |
| <b>110</b> | 5321 | <b>135</b> | 5339 | <b>160</b> | 5303 | <b>185</b> | 5138 |
| <b>111</b> | 5457 | <b>136</b> | 5284 | <b>161</b> | 5258 | <b>186</b> | 5313 |
| <b>112</b> | 5492 | <b>137</b> | 5235 | <b>162</b> | 5327 | <b>187</b> | 5404 |
| <b>113</b> | 5485 | <b>138</b> | 5582 | <b>163</b> | 5398 | <b>188</b> | 5269 |
| <b>114</b> | 5408 | <b>139</b> | 5454 | <b>164</b> | 5296 | <b>189</b> | 5379 |
| <b>115</b> | 5392 | <b>140</b> | 5095 | <b>165</b> | 5371 | <b>190</b> | 5281 |
| <b>116</b> | 5535 | <b>141</b> | 5462 | <b>166</b> | 5412 | <b>191</b> | 5356 |
| <b>117</b> | 5450 | <b>142</b> | 5386 | <b>167</b> | 5302 | <b>192</b> | 5186 |
| <b>118</b> | 5352 | <b>143</b> | 5307 | <b>168</b> | 5414 | <b>193</b> | 5358 |
| <b>119</b> | 5304 | <b>144</b> | 5258 | <b>169</b> | 5260 | <b>194</b> | 5210 |
| <b>120</b> | 5481 | <b>145</b> | 5362 | <b>170</b> | 5258 | <b>195</b> | 5400 |
| <b>121</b> | 5228 | <b>146</b> | 5239 | <b>171</b> | 5359 | <b>196</b> | 5545 |
| <b>122</b> | 5231 | <b>147</b> | 5420 | <b>172</b> | 5304 | <b>197</b> | 5236 |
| <b>123</b> | 5511 | <b>148</b> | 5312 | <b>173</b> | 5173 | <b>198</b> | 5292 |
| <b>124</b> | 5181 | <b>149</b> | 5216 | <b>174</b> | 5143 | <b>199</b> | 5395 |
| <b>125</b> | 5294 | <b>150</b> | 5194 | <b>175</b> | 5447 | <b>200</b> | 5404 |
| <b>126</b> | 5367 | <b>151</b> | 5333 | <b>176</b> | 5287 |            |      |
| <b>127</b> | 5386 | <b>152</b> | 5273 | <b>177</b> | 5312 |            |      |
| <b>128</b> | 5310 | <b>153</b> | 5331 | <b>178</b> | 5224 |            |      |

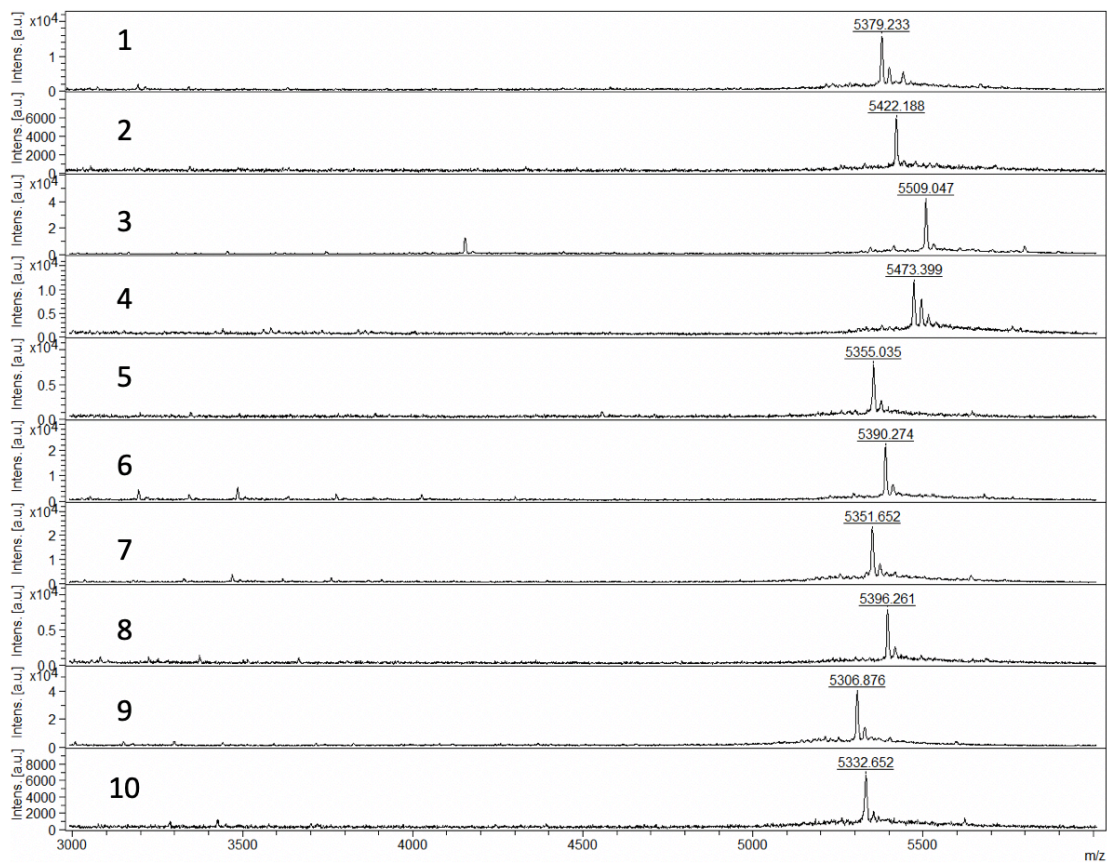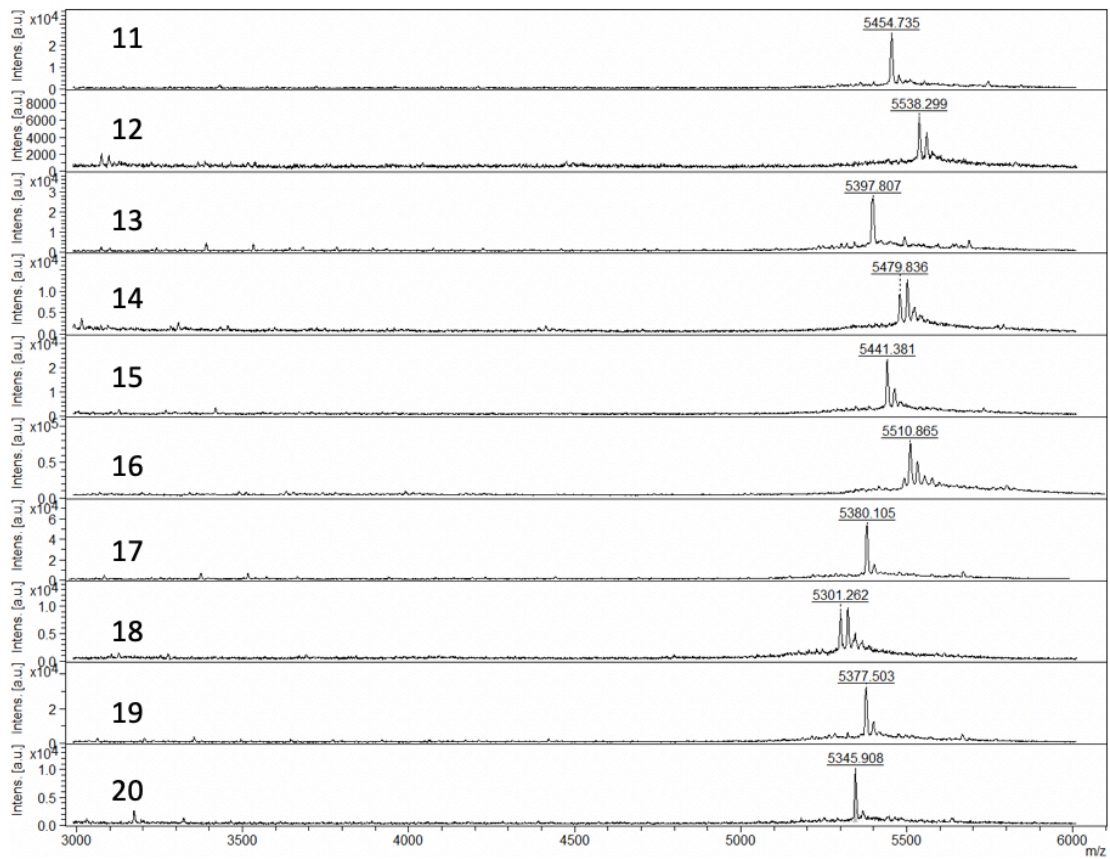

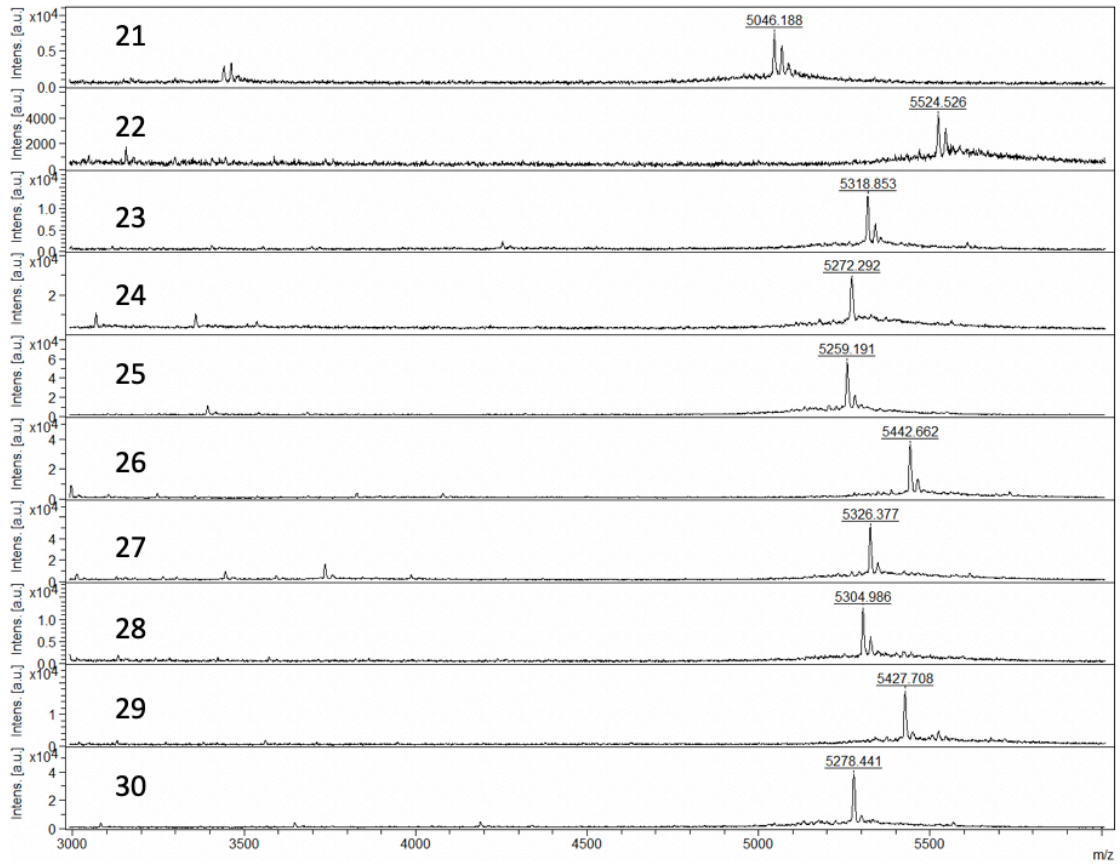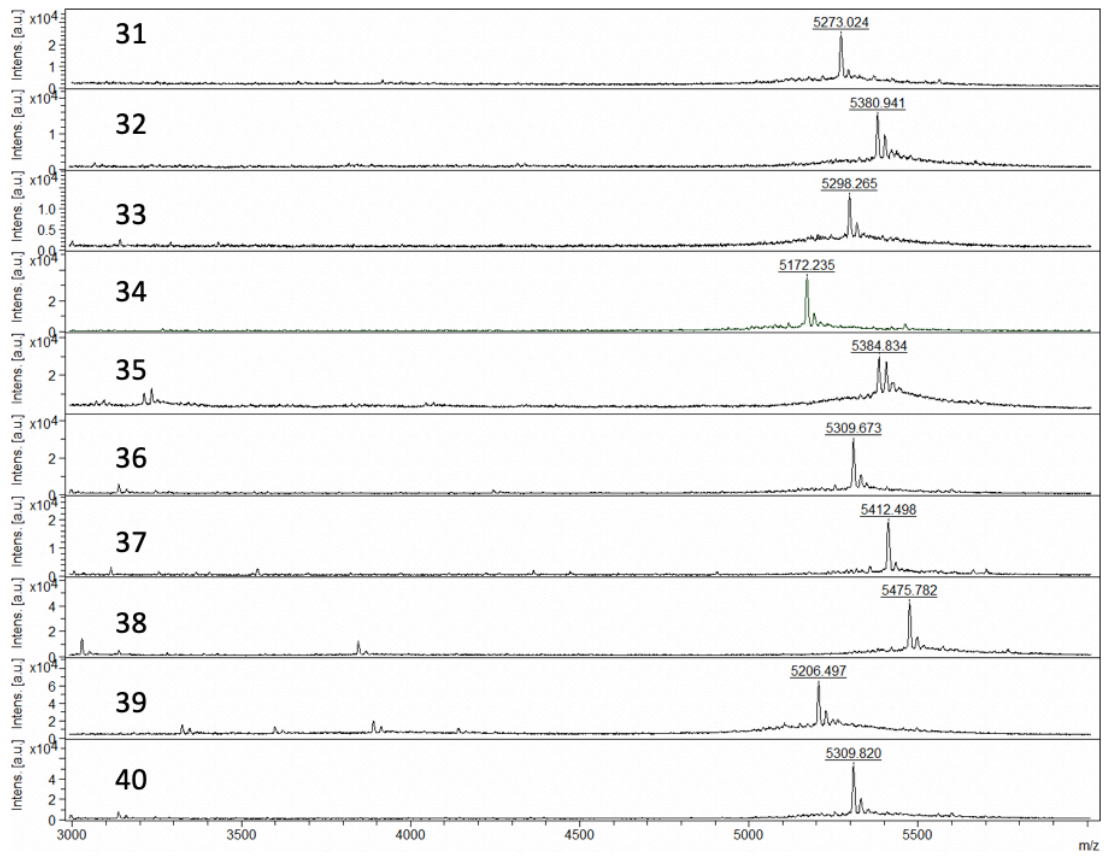

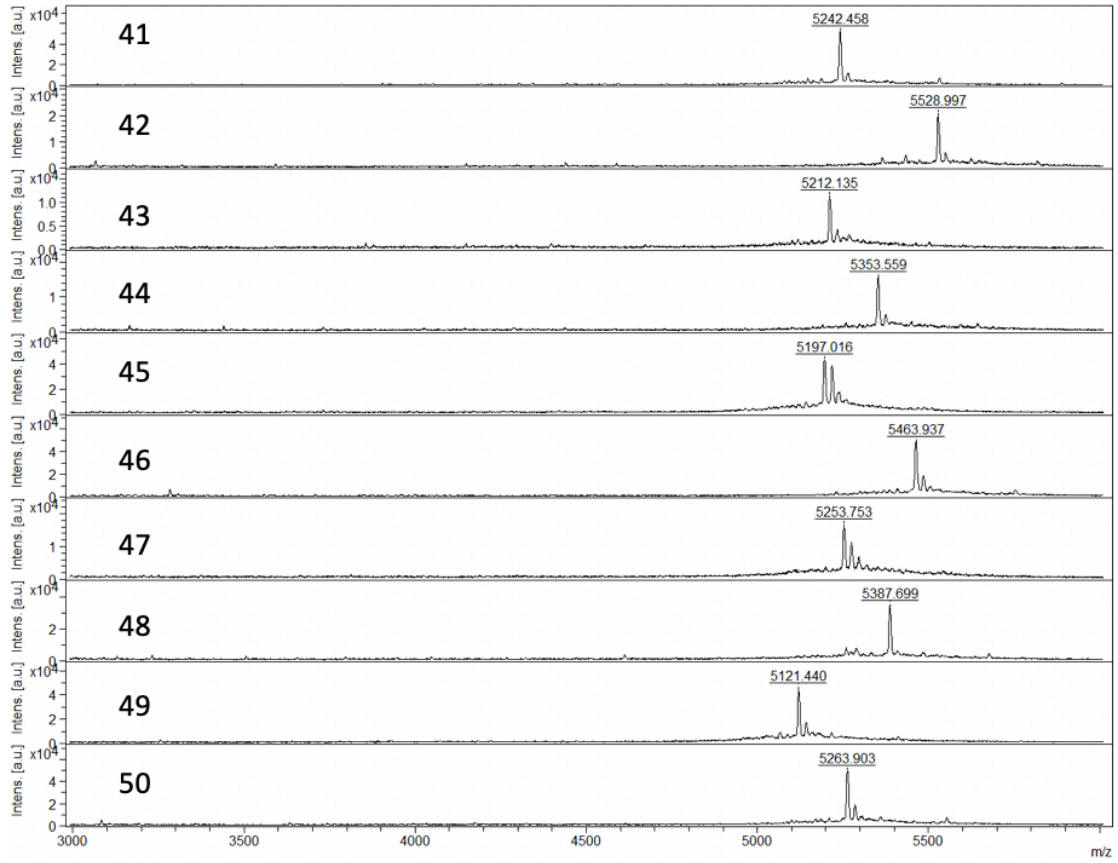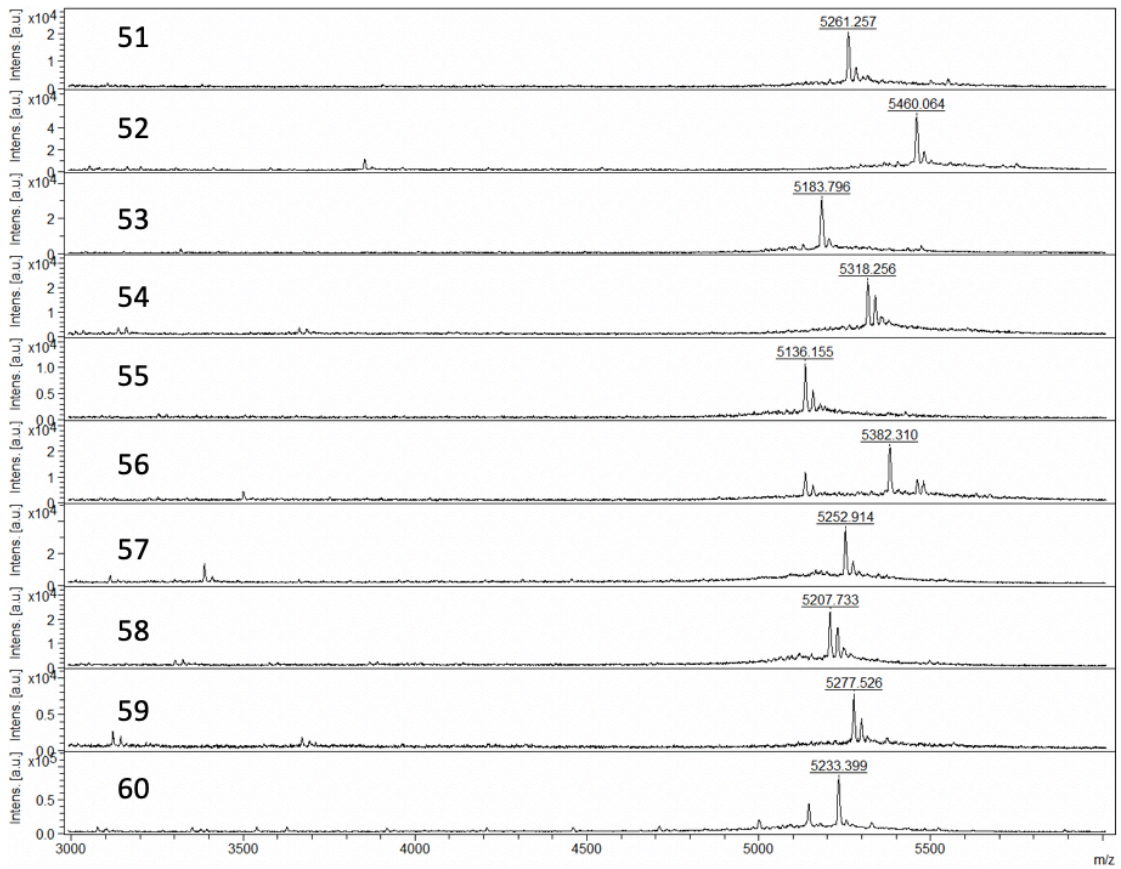

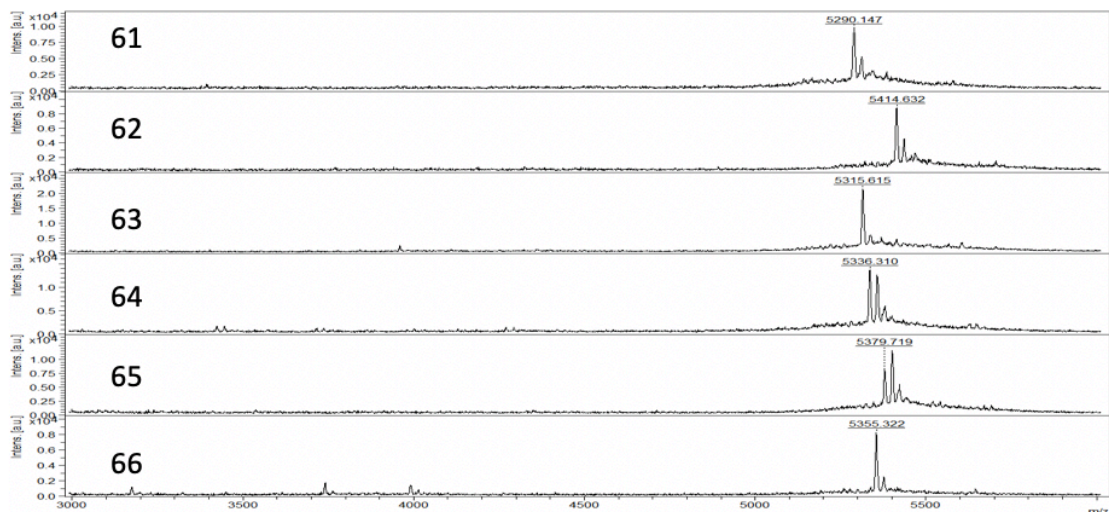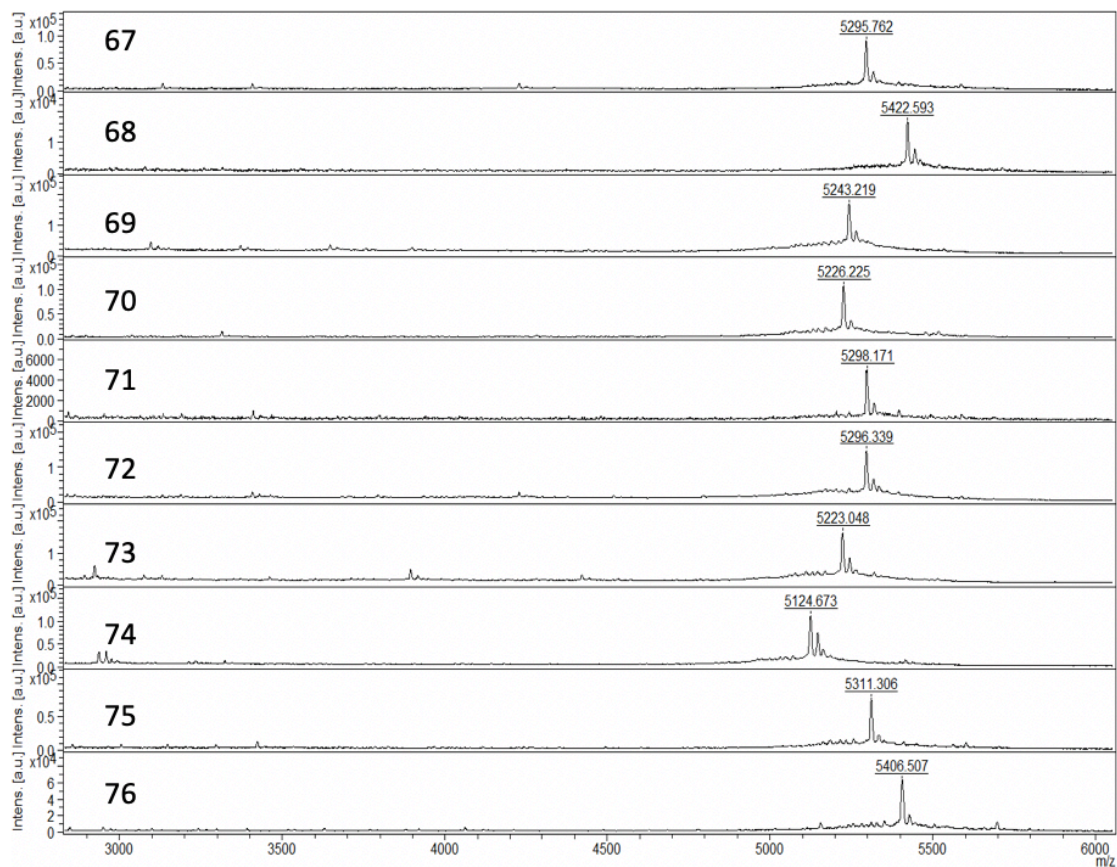

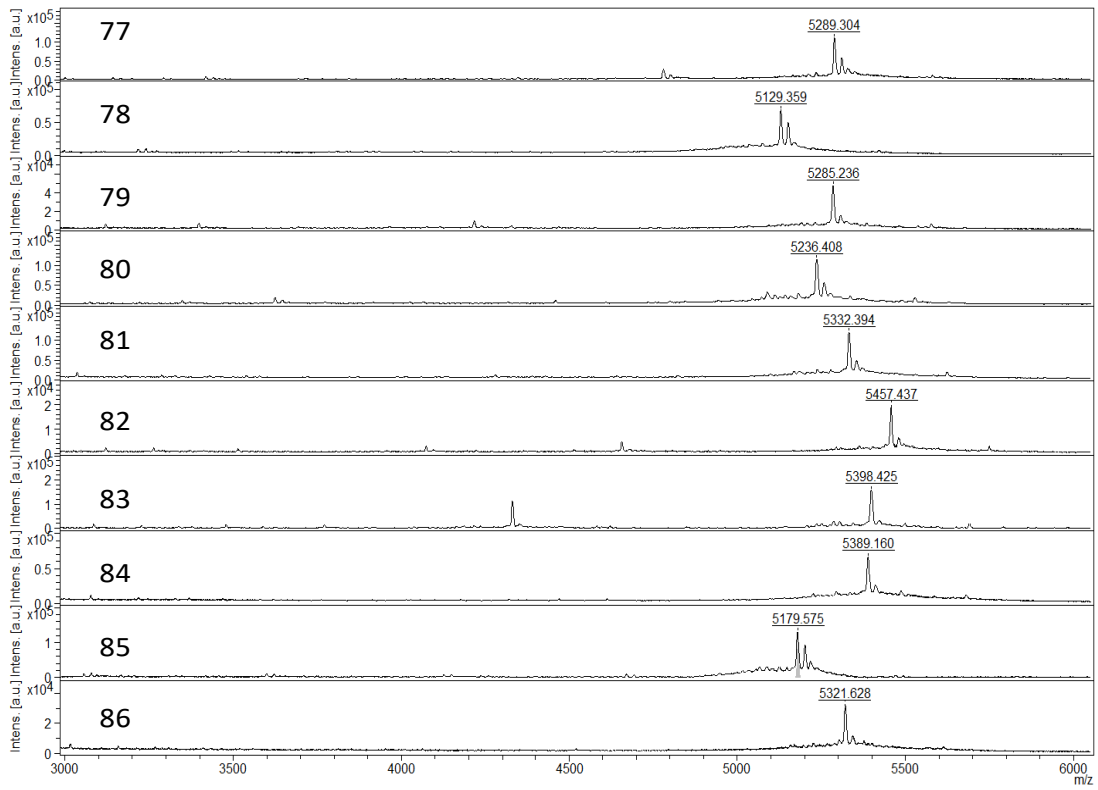



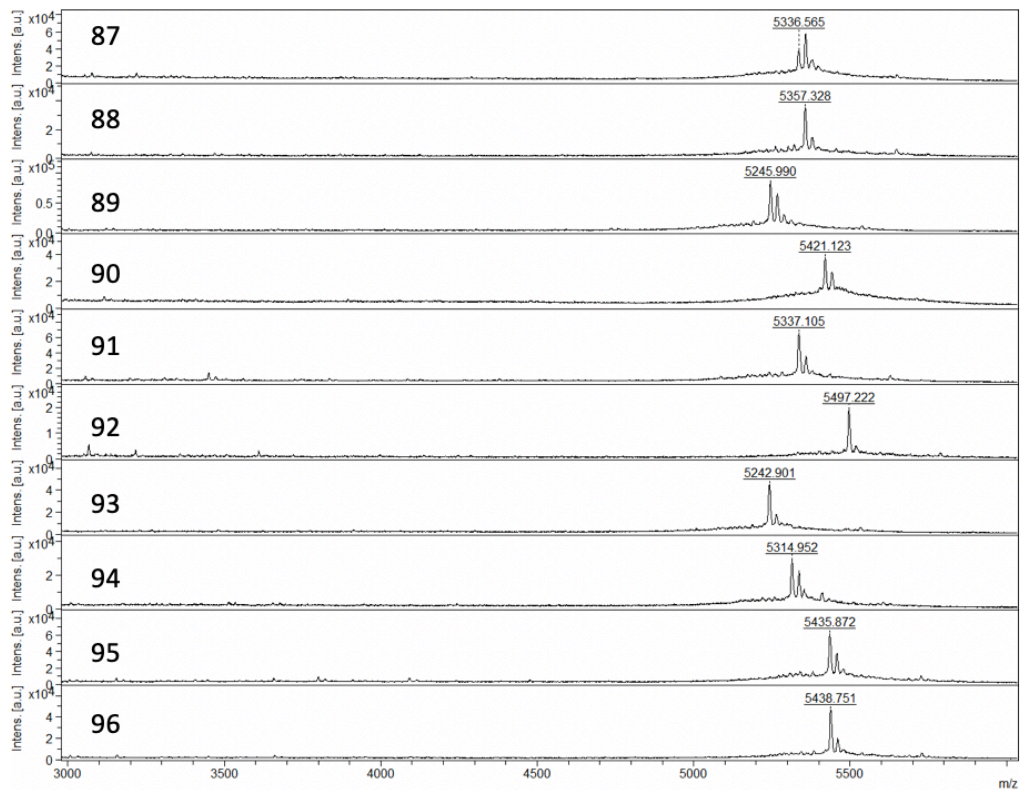

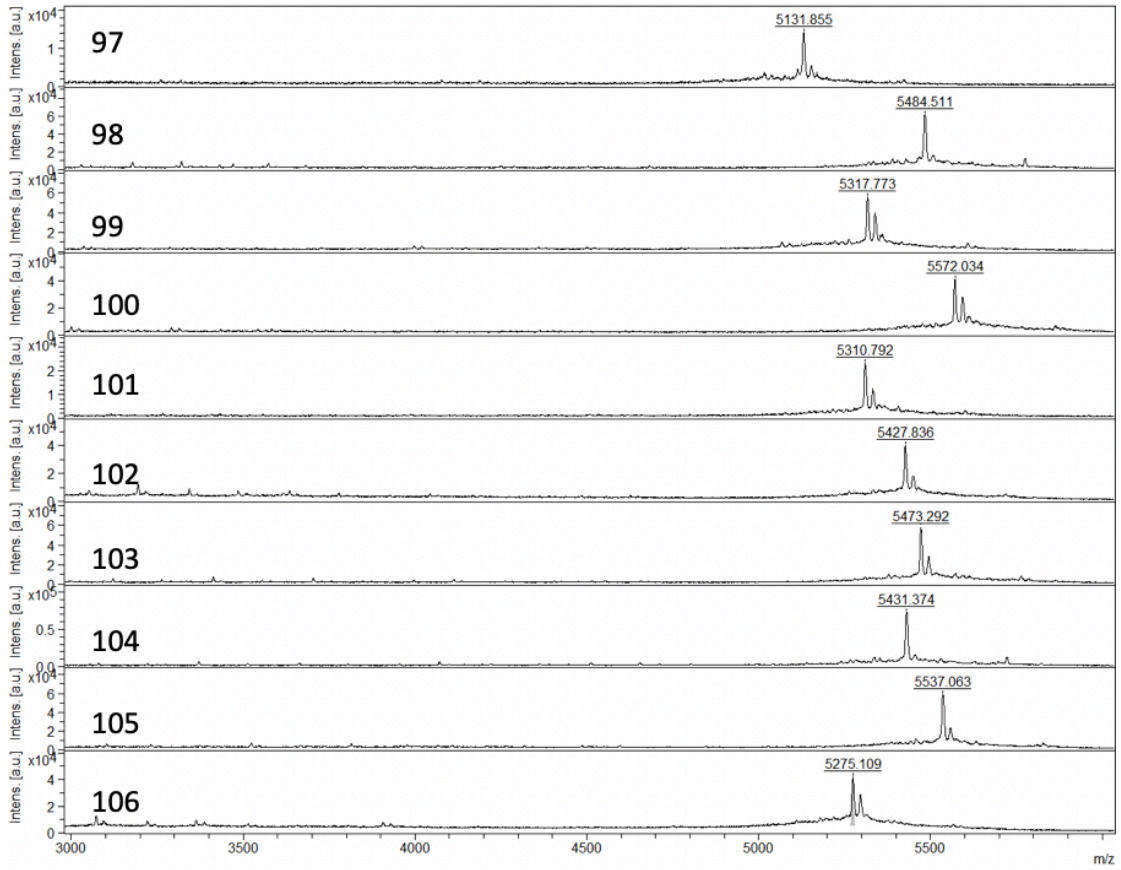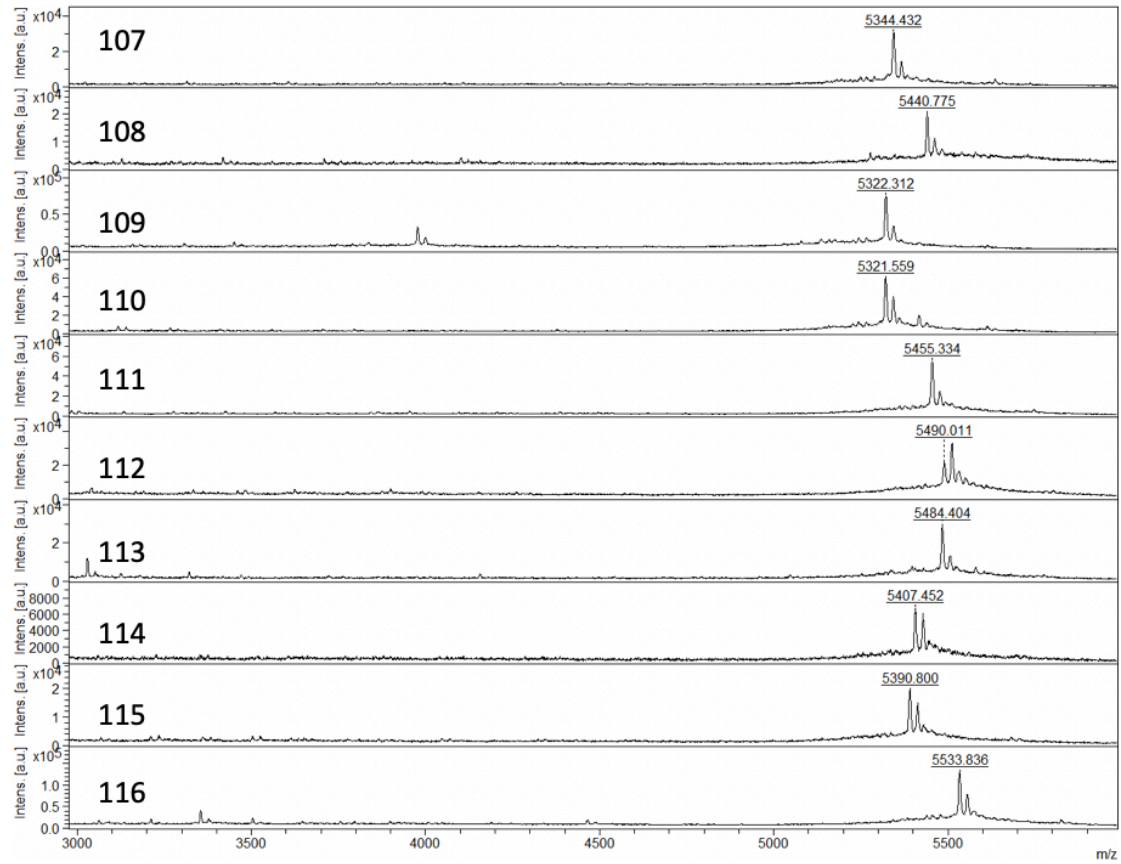

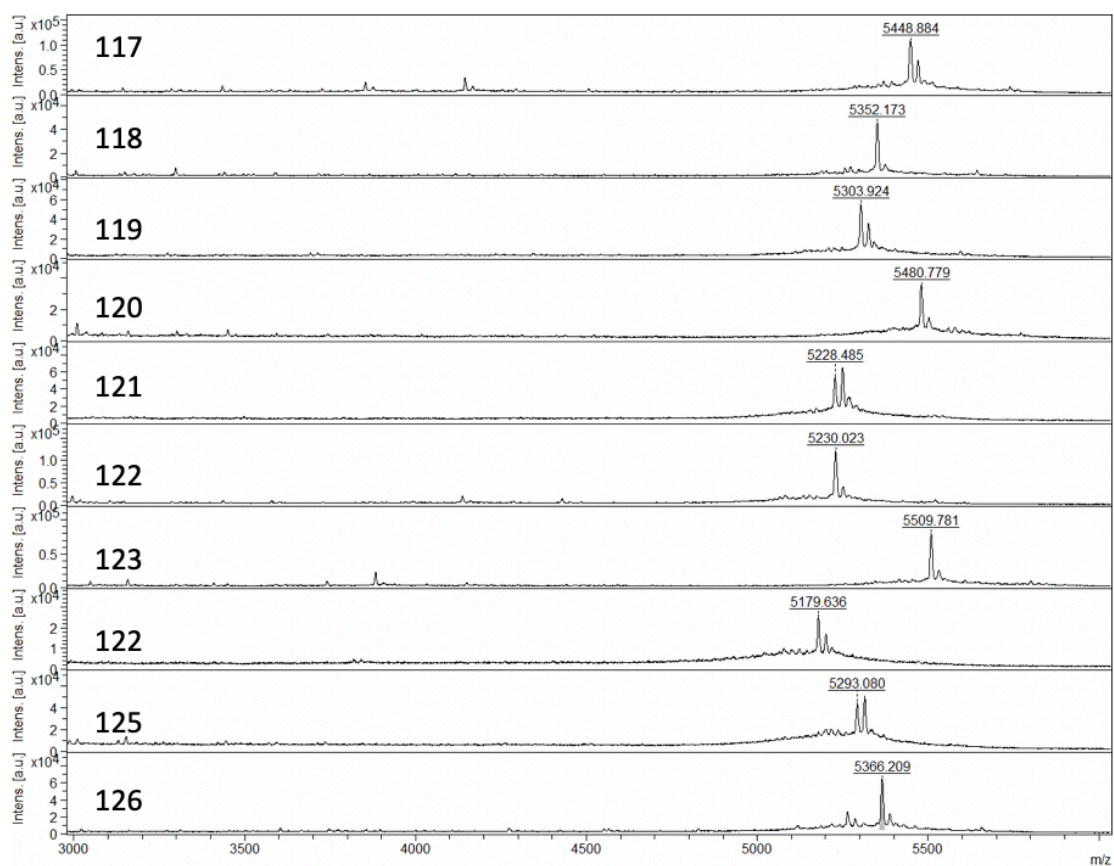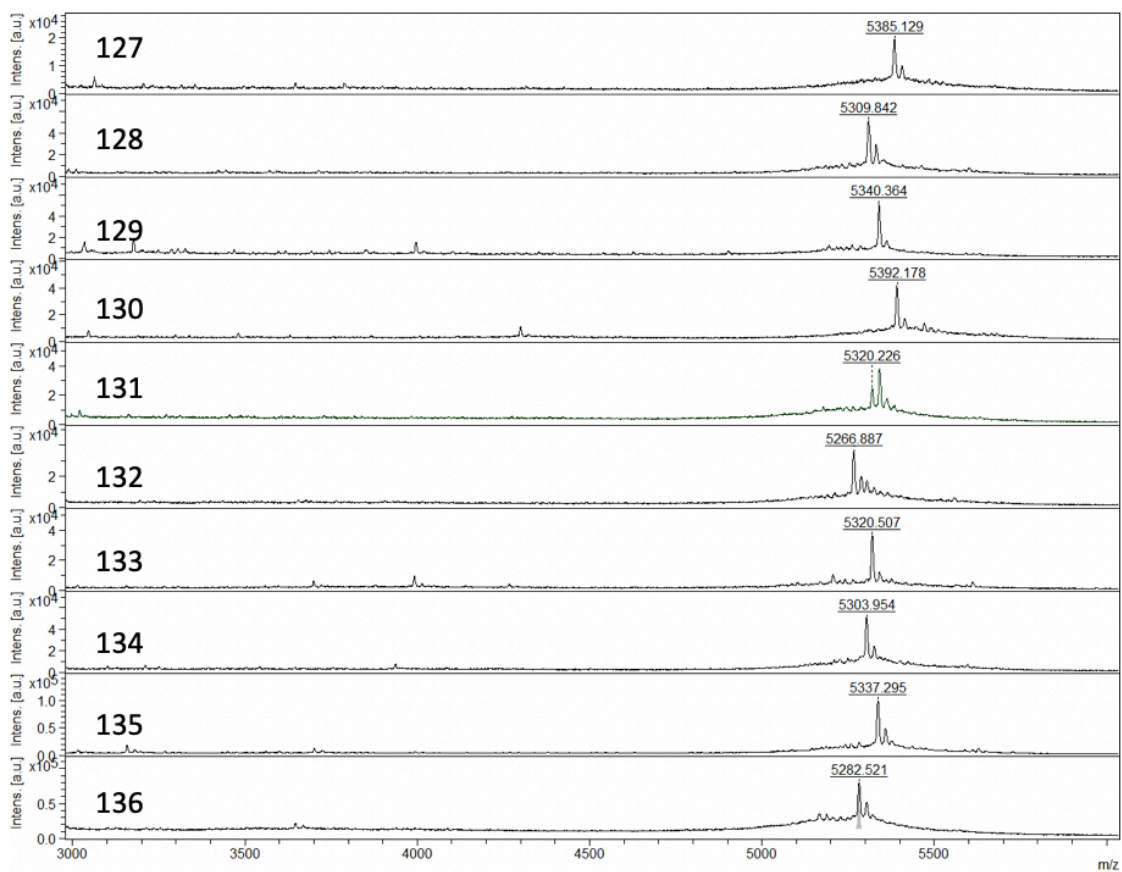

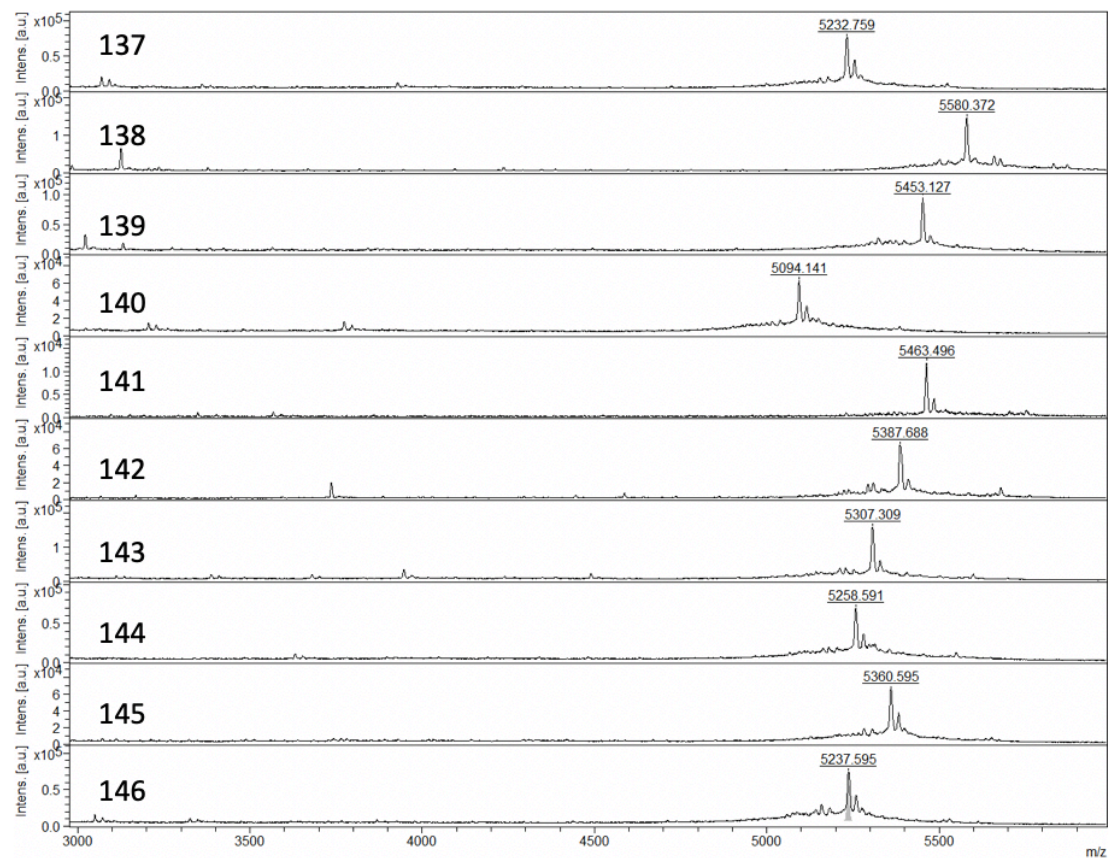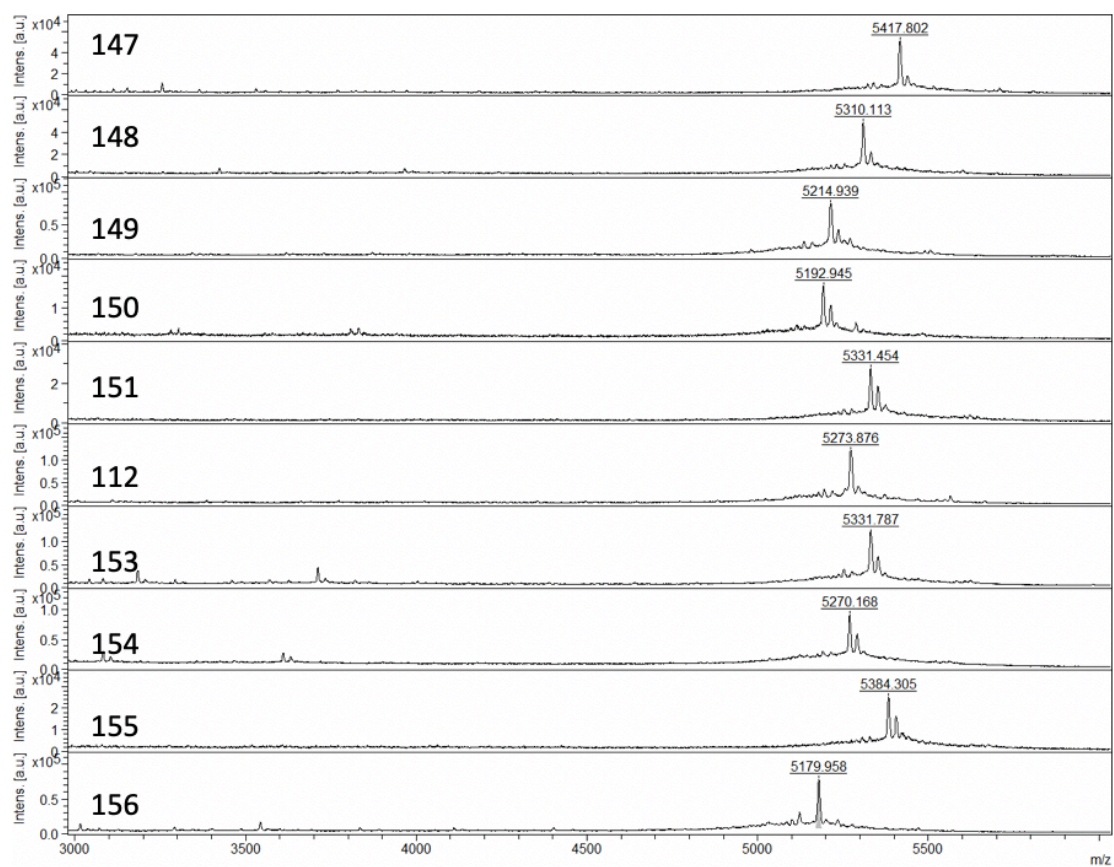

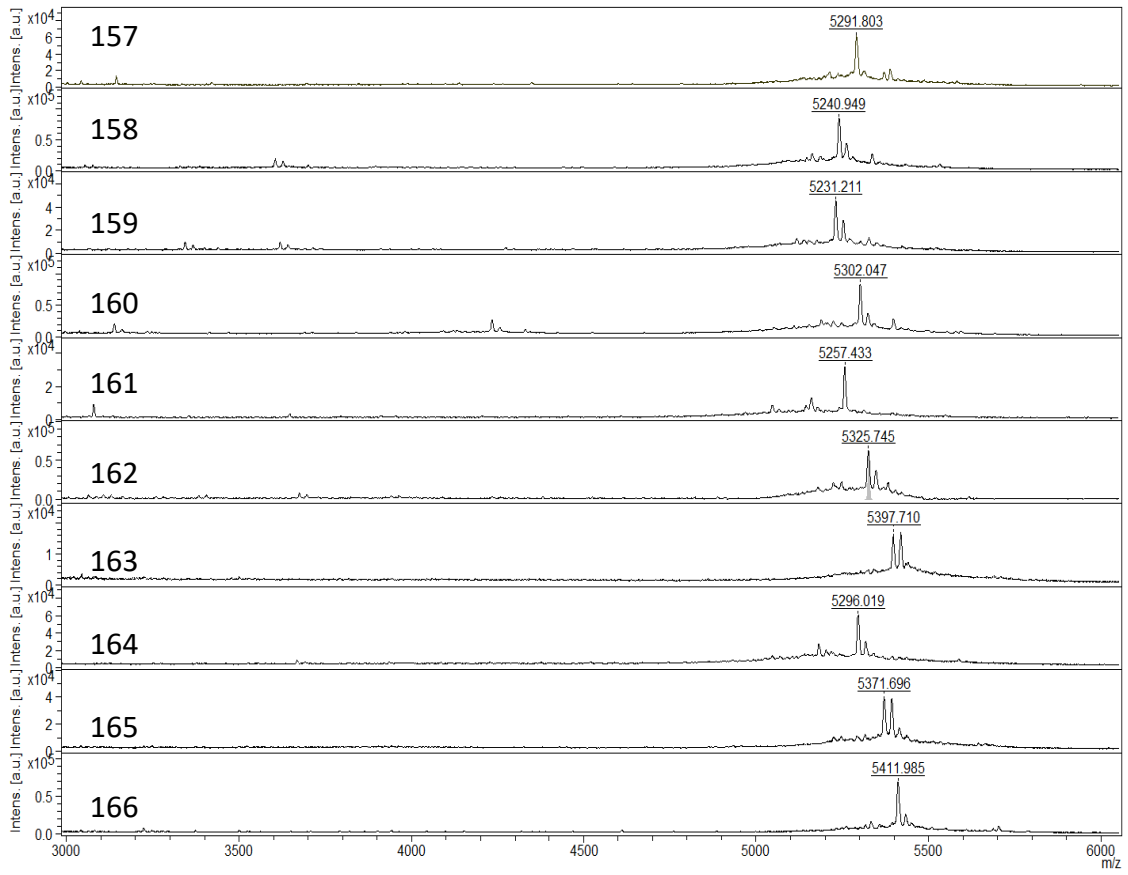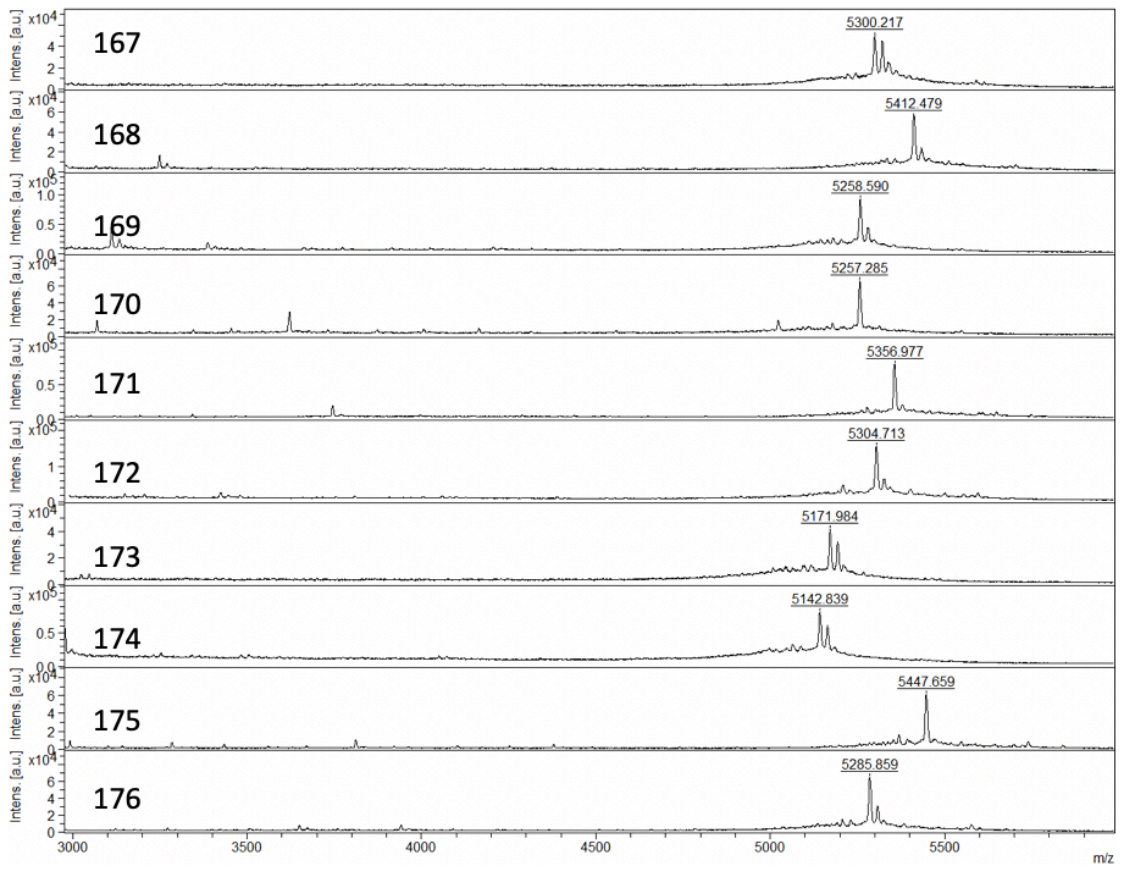

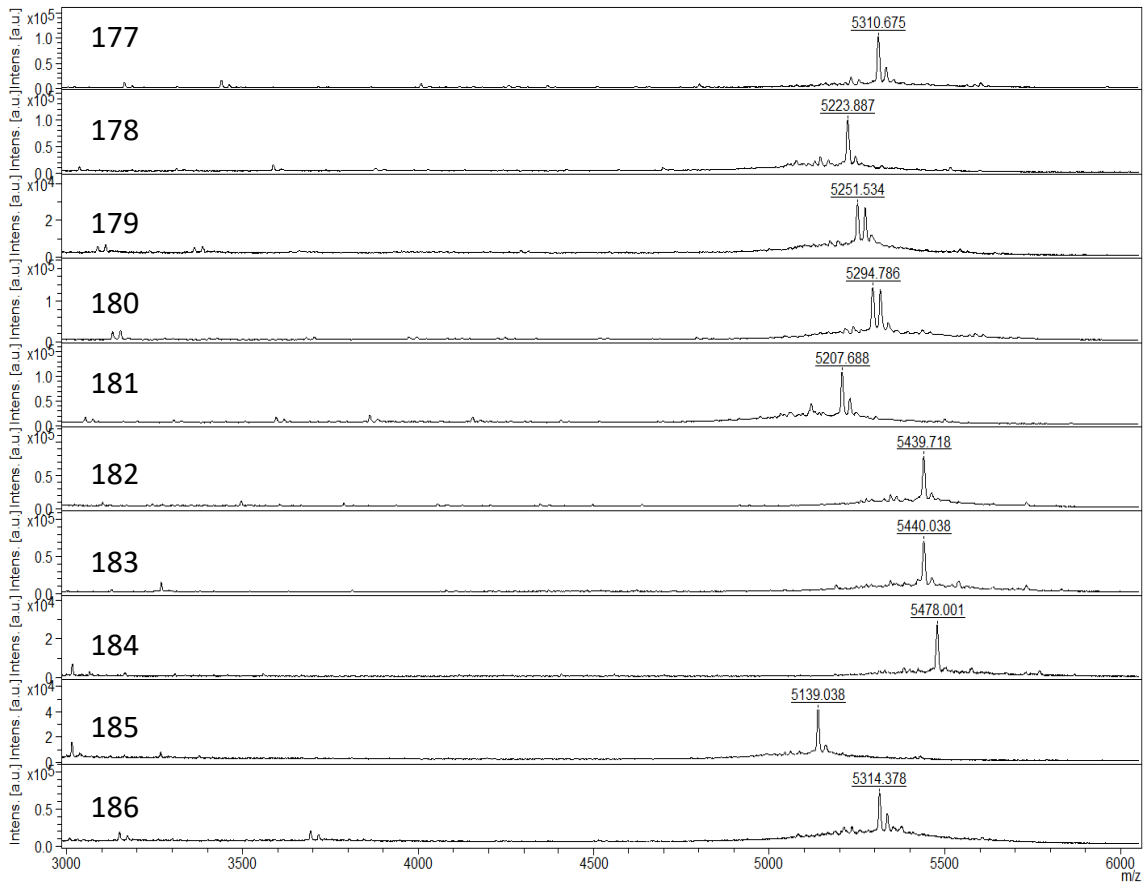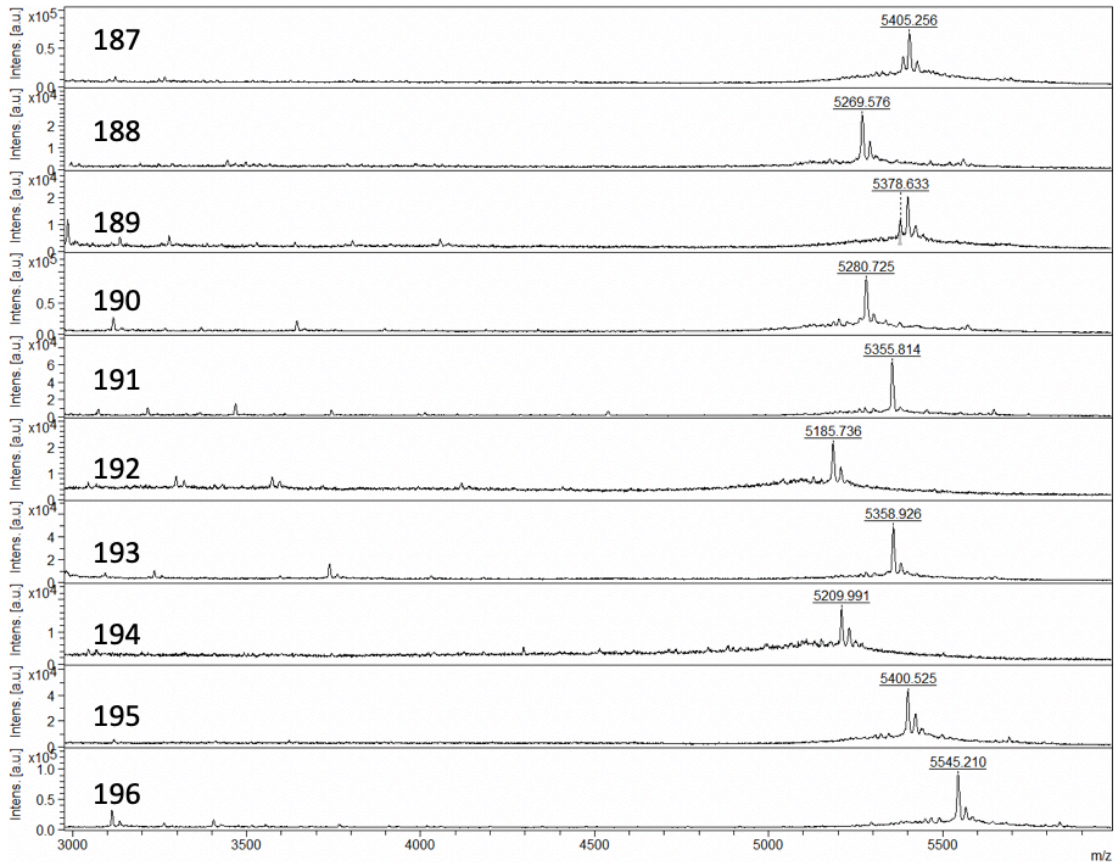

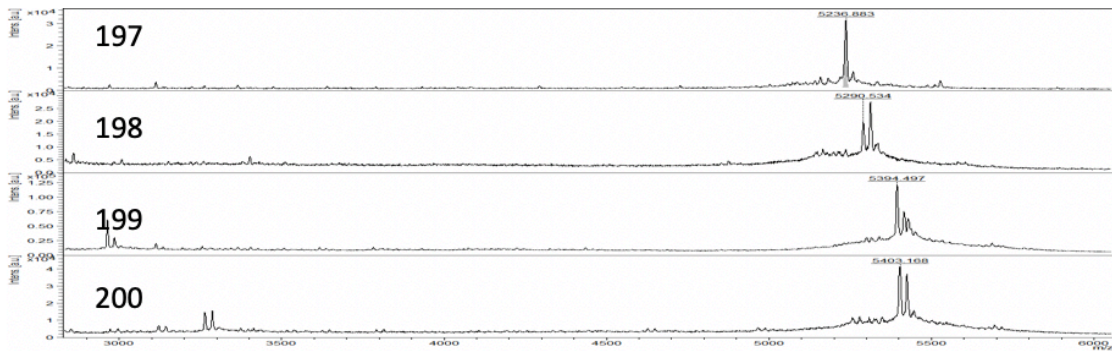

### 2.3 Characterization of the biotinylated peptides

**Biotin-155.55:** N'-Biotin-PEG-His-Val-Asn-Asn-Ser-Tyr-Glu-Cys-Asp-Ile-Pro-Ile-Gly-Ala-Gly-Ile-Cys-Ala-C'

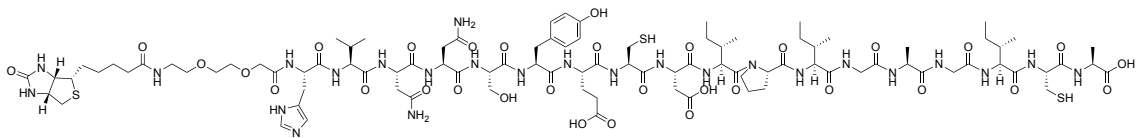

(C<sub>95</sub>H<sub>147</sub>N<sub>25</sub>O<sub>32</sub>S<sub>3</sub>) M<sup>+</sup> Isotopic peaks with relative distribution: 2247.99 (100.0%), 2246.99 (97.3%), 2248.99 (41.6%)

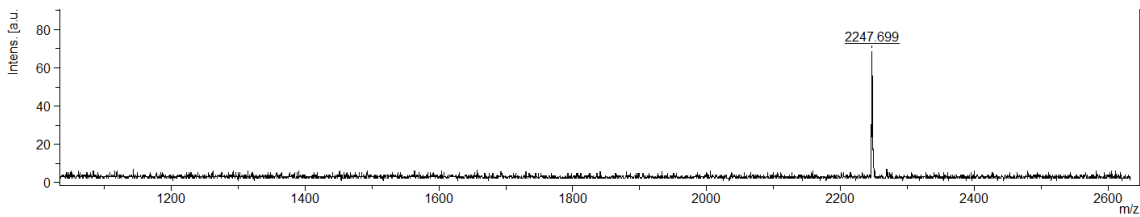

**Scrambled Biotin-155.55:** N'-Biotin-x-Cys-Asn-Glu-His-Ala-Ile-Tyr-Asn-Asp-Gly-Ser-Ala-Ile-Val-Cys-Ile-Gly-Pro-C'

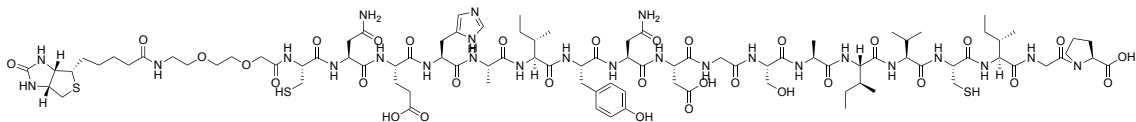

(C<sub>95</sub>H<sub>147</sub>N<sub>25</sub>O<sub>32</sub>S<sub>3</sub>) M<sup>+</sup> Isotopic peaks with relative distribution: 2247.99 (100.0%), 2246.99 (97.3%), 2249.00 (41.6%)

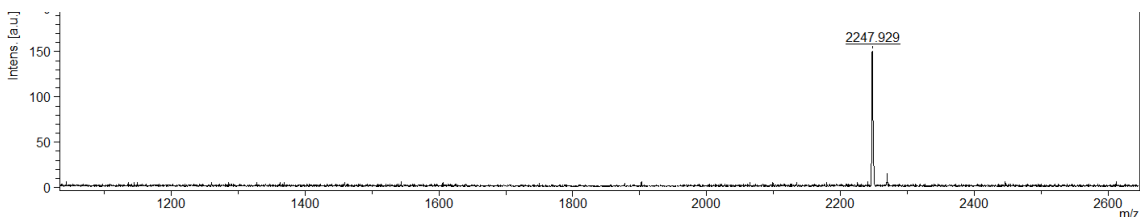

## 2.4 Design and characterization of the sequences for 155 Ala Scan

|                                                                    |         |
|--------------------------------------------------------------------|---------|
| <b>Ala-1:</b> N'- AAGCGTGGGTCGGC - PEG - hvnnsyecdipigagica - C'   | MW=5895 |
| <b>Ala-2:</b> N'- AGAGACGGCCCGGC - PEG - avnnsyecdipigagica - C'   | MW=5782 |
| <b>Ala-3:</b> N'- AGAGGCAACGCGGC - PEG - hannsyecdipigagica - C'   | MW=5845 |
| <b>Ala-4:</b> N'- GCAGAGCAGCCGGC - PEG - hvansyecdipigagica - C'   | MW=5806 |
| <b>Ala-5:</b> N'- CGGACGACGGCGGC - PEG - hvnasyecdipigagica - C'   | MW=5822 |
| <b>Ala-6:</b> N'- CGGAACGGGTCGGC - PEG - hvnnsyecdipigagica - C'   | MW=5864 |
| <b>Ala-7:</b> N'- GCAGGCAGCCCGGC - PEG - hvnnsaecdipigagica - C'   | MW=5733 |
| <b>Ala-8:</b> N'- GCAGGTGACGCGGC - PEG - hvnnsyacdipigagica - C'   | MW=5822 |
| <b>Ala-9:</b> N'- AAGCCGAAGCCGGC - PEG - hvnnsyeadipigagica - C'   | MW=5801 |
| <b>Ala-10:</b> N'- AGAGGTGCGGCGGC - PEG - hvnnsyecaipigagica - C'  | MW=5876 |
| <b>Ala-11:</b> N'- CGGAGCAGGTCGGC - PEG - hvnnsyecdapigagica - C'  | MW=5838 |
| <b>Ala-12:</b> N'- AAGCAGCGCCCGGC - PEG - hvnnsyecdiaigagica - C'  | MW=5783 |
| <b>Ala-13:</b> N'- AGAGAGCGGTCGGC - PEG - hvnnsyecdipagagica - C'  | MW=5862 |
| <b>Ala-14:</b> N'- AGAGCGAGGTCGGC - PEG - hvnnsyecdipiaagica - C'  | MW=5918 |
| <b>Ala-15:</b> N'- GCAGCGAGCCCGGC - PEG - hvnnsyecdipigaica - C'   | MW=5839 |
| <b>Ala-16:</b> N'- AAGCGCACGGCGGC - PEG - hvnnsyecdipigagaca - C'  | MW=5807 |
| <b>Ala-17:</b> N'- CGGAGTGAGCCCGGC - PEG - hvnnsyecdipigagiaa - C' | MW=5848 |



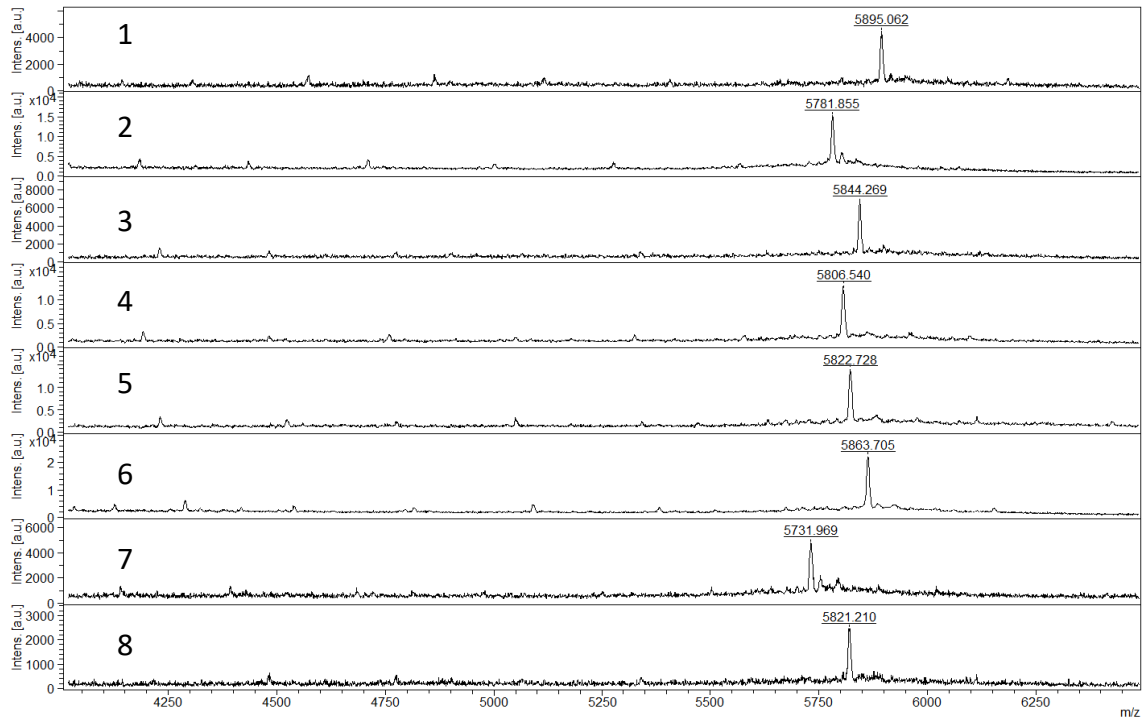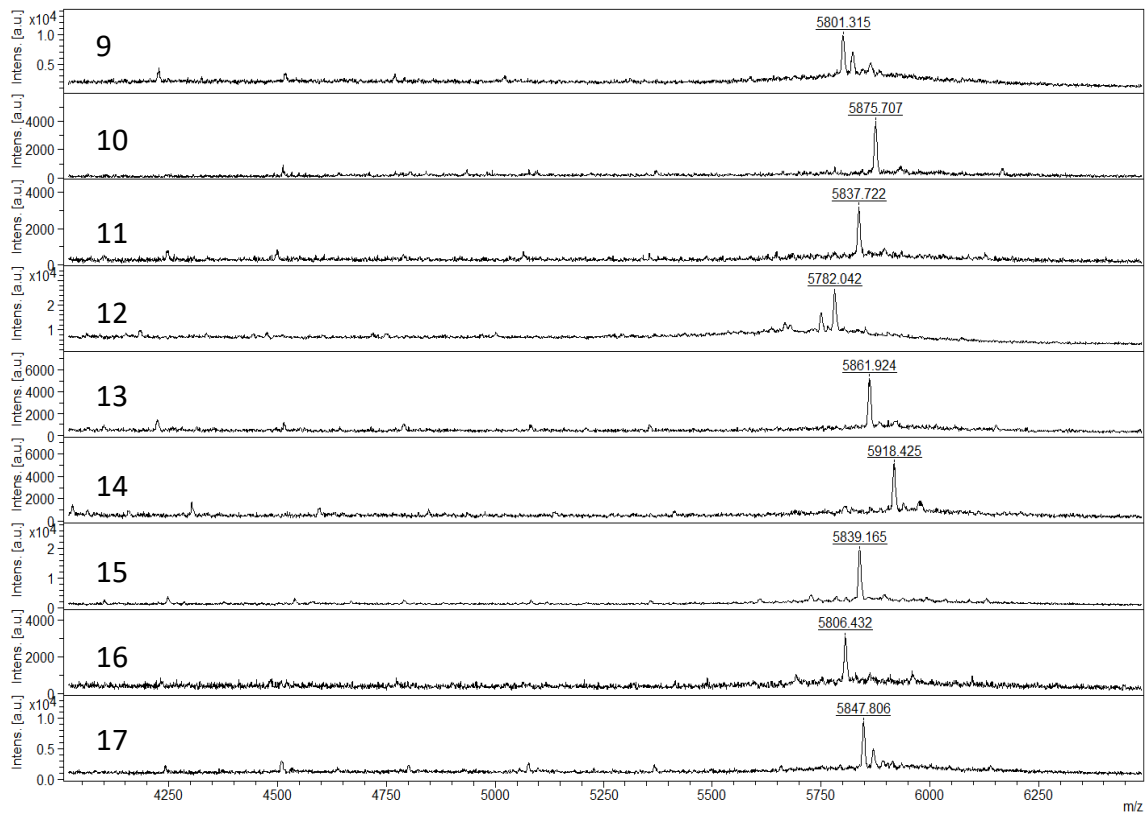

### **3. Microarray screening**

#### **3.1 – Hybridization of the PNA-Peptide library**

1.0  $\mu\text{L}$  of a 20 $\mu\text{M}$  solution of PNA-peptide library in DMSO was mixed with 50  $\mu\text{L}$  of hybridization buffer (1.2mM LiCl, 300mM Li-MES pH 6.1) 12mM EDTA and 3% Lithium Dodecyl Sulfate), 50  $\mu\text{L}$  of Triton X-100 (Sigma-Aldrich Ref: 93443) and 1.0  $\mu\text{L}$  of Salmon sperm DNA (Sigma-Aldrich Ref: D9156). This sample was heated at 95°C for 5 minutes and centrifuged 2 minutes at 15,000g. Finally, 82  $\mu\text{L}$  of the library solution were added into each array of the slide and hybridized overnight at 60°C. After hybridization, the slides were washed for 5 minutes with SSC buffer 2x 0.1% SDS, 5 minutes with SSC buffer 0.2x 0.1%SDS and finally 30 seconds in water prior to drying by centrifugation 3 minutes at 1,000g.

#### **3.2 – Incubation with patient's plasma samples**

Analysis samples were prepared by diluting 15  $\mu\text{L}$  of the plasma into 90  $\mu\text{L}$  of PBS with Protease inhibitors (Promega G6521). From this diluted plasma, 5.0  $\mu\text{L}$ , was further diluted into 100  $\mu\text{L}$  of PBS-t-0.5%BSA and 1.0  $\mu\text{L}$  of salmon sperm DNA to make a final dilution of 1:150. The mixture was centrifuged for 1 minute at 15,000g and 82  $\mu\text{L}$  were added into the microarray and incubated for 1 hour at room temperature.

After incubation, the slide was washed for 5minutes with PBS-t and 30 seconds with water. Finally, the slide was dried by centrifugation for 1 minute at 1000g and ready for next step.

#### **3.3 – Incubation of the secondary antibody**

1.0  $\mu\text{L}$  of Goat Anti-Human IgG H&L Cy3 (ab97170 from Abcam) was diluted with 450  $\mu\text{L}$  of PBS-t and 50  $\mu\text{L}$  of BSA 5% and centrifuged for 1 minute at 12krpm. This mixture, 82  $\mu\text{L}$ , was added into the microarray and incubated for 30 minutes at room temperature. After incubation, the slide was washed for 5 minutes with PBS-t and 30 seconds with de

ionized water. The slide was finally dried by centrifugation for 3 minutes at 1000g and scanned on the Cy3 channel with GenePix 4100A Microarray Scanner.

### **3.4 – Data Analysis**

Heat map of fluorescence intensity (Cy3 channel) for the screen of 200 peptide -PNA encoded library of linear epitopes from the Spike protein. The fluorescence is the median of 23 values of fluorescence quantification and then normalized to background.

#### 4. On beads hit validation

0.3 $\mu$ L of Pierce™ High-Capacity Streptavidin Agarose Beads (Cat n°: 20357) were mixed with 50 $\mu$ L of the biotinylated peptide 10 $\mu$ M in PBS-t. The beads were incubated for 20' and thereafter blocked with 200 $\mu$ L of Fetal bovine plasma for 10'. The beads were then washed once with 100 $\mu$ L PBS-t and 5 $\mu$ L of plasma from either positive or negative patients was added together with 450 $\mu$ L of PBS-t and 50 $\mu$ L of fetal bovine plasma. The beads were incubated for 90' and after washed 4 times with 100 $\mu$ L of PBS-t in order to remove all the non-binders. Finally, 200 $\mu$ L of a 163nM solution of anti-human IgG-FITC (ref: ab6854) in PBS-t with 0.5% BSA was added and incubated for 1h. The excess of secondary antibody is washed away by washing 3 times with 100 $\mu$ L of PBS-t and finally the beads are imaged with Leica SP8 inverted confocal microscope (laser intensity: filters: ). Quantification of FITC fluorescence was done with ImageJ by quantifying 10 different points of 10 different beads in the same image.

Images with its corresponding bright field:

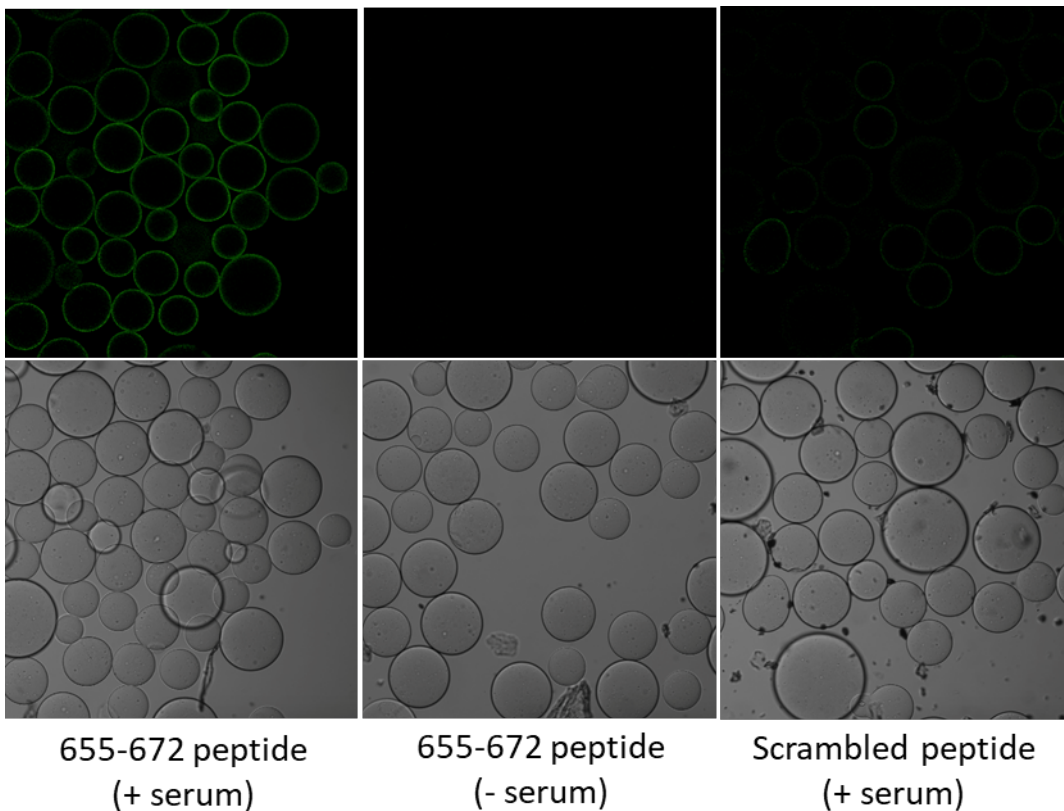

## 5. ELISA assay

100µL of a 80nM solution of Streptavidin (Sigma Aldrich ref:S0677) in PBS were added to a Corning® 96-well Clear Flat Bottom Polystyrene High Bind Microplate (Corning, Catalog # 9018) and incubated overnight at 4°C. The plate was then washed three times with 300µL of PBS-T (1', rt) and 200µL of an 800nM solution of biotinylated peptide in PBS-T were added and incubated for 90' at 36°C. The plate was then blocked with 300µL of PBS-T with 0.5% non-fat dry milk (60' at 36°C). The plate was washed 3 times with 300µL of PBS-T (1', rt) and a 1:300 diluted plasma in PBS-T-0.5% non-fat dry milk was added to each well and incubated for 90' at 36°C. After incubation of the plasma, the plate was washed 3 times with 300µL PBS-T (1', rt), 1 time with PBS-T 0.5% non-fat dry milk (60', 37°C) and again 3 times with 300µL PBS-T (1', rt). 100µL of Goat Anti-Human-IgG HRP conjugated (ref: ab97175) 1:10000 diluted in PBS-T 0.5% BSA were added to each well and incubated for 90' at 37°C. The plate was then washed 3 times with PBS-T (1', rt) and 200µL of a 0.41mM solution of 3,3',5,5'-Tetramethylbenzidine (TMB) (Sigma Aldrich ref: 860336) in a "50mM Na<sub>2</sub>HPO<sub>4</sub>, 25mM citric acid, pH 5.5 and 0.0024% H<sub>2</sub>O<sub>2</sub>" solution were added to the plate and incubated for 20' at 37 °C. Finally, 50µL of a 1M sulfuric acid solution were added and the absorbance was measured at 450nm with a plate reader. For each sample, triplicates were done and the fluorescence value are the average of 3 reads.

## 6. Expanded image of heat map with peptide sequence numbers

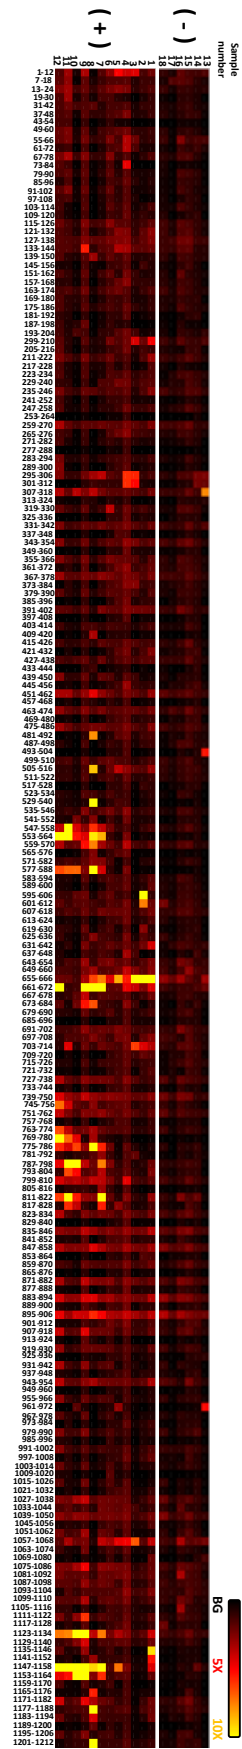

## References

1. Wu F, Zhao S, Yu B, Chen YM, Wang W, Song ZG, et al. A new coronavirus associated with human respiratory disease in China. *Nature*. 2020;579(7798):265-9.
